1 Bone regeneration in Ds-Red pig calvarial defect using allogenic transplantation of  
2 EGFP-pMSCs – a comparison of host cells and seeding cells in the scaffold

3 Short title: *In vivo* comparison of host cells and seeding cells

4 Ming-Kai Hsieh<sup>1,2,3,4</sup>, Chia-Jung Wu<sup>2,3</sup>, Xuan-Chun Su<sup>5</sup>, Yi-Chen Chen<sup>1,5,6</sup>, Tsung-Ting  
5 Tsai<sup>2,3,4</sup>, Chi-Chien Niu<sup>2,3,4</sup>, Po-Liang Lai<sup>2,3,4</sup>\*, Shinn-Chih Wu<sup>1,5,6\*</sup>

6 <sup>1</sup>Institute of Biotechnology, National Taiwan University, Taipei, Taiwan.

7 <sup>2</sup>Department of Orthopaedic Surgery, Chang Gung Memorial Hospital, Taoyuan, Taiwan

8 <sup>3</sup>Bone and Joint Research Center, Chang Gung Memorial Hospital, Taoyuan, Taiwan

9 <sup>4</sup>College of Medicine, Chang Gung University, Taoyuan, Taiwan

10 <sup>5</sup>Department of Animal Science and Technology, National Taiwan University, Taipei, Taiwan.

11 <sup>6</sup>Center for Biotechnology, National Taiwan University, Taipei, Taiwan.

12

13 \* Shinn-Chih Wu and Po-Liang Lai are co-corresponding authors

14 Corresponding authors:

15 Dr. Po-Liang Lai

16 Department of Orthopaedic Surgery, Chang Gung Memorial Hospital, No. 5, Fu-Shing St.,

17 Kweishan, Taoyuan 33305, Taiwan

18 Tel: +886-3-328-1200 ext. 3612 Fax: +886-3-327-8113

19 Email: [polianglai@gmail.com](mailto:polianglai@gmail.com)

20 Dr. Shinn-Chih Wu

21 Institute of Biotechnology, National Taiwan University, Taipei, Taiwan, R.O.C.

22 Center for Biotechnology, National Taiwan University, Taipei, Taiwan, R.O.C.

23 Department of Animal Science and Technology, National Taiwan University, Taipei, Taiwan,

24 No.50, Lane 155, Sec. 3, Kee-lung Road, Taipei, 10672, Taiwan, Tel: +886-2-33664147, Fax:

25 +886-2-27324070, E-mail: [scw01@ntu.edu.tw](mailto:scw01@ntu.edu.tw)

26

27  
28 **Keywords:** mesenchymal stem cell, bone regeneration, enhanced green fluorescent, DsRed pig,  
29 pig calvarial defect model

30

## 31 **Abstract**

32 **Background:** Cells, scaffolds, and factors are the triad of regenerative engineering;  
33 however, it is difficult to distinguish whether cells in the regenerative construct are from the  
34 seeded cells or host cells via the host blood supply. We performed a novel *in vivo* study to  
35 transplant enhanced green fluorescent pig mesenchymal stem cells (EGFP-pMSCs) into calvarial  
36 defect of DsRed pigs. The cell distribution and proportion were distinguished by the different  
37 fluorescent colors through the whole regenerative period.

38 **Method/Results:** Eight adult domestic Ds-Red pigs were treated with five modalities:  
39 empty defects without scaffold (group 1); defects filled only with scaffold (group 2); defects  
40 filled with osteoinduction medium-loaded scaffold (group 3); defects filled with  $5 \times 10^3$   
41 cells/scaffold (group 4); and defects filled with  $5 \times 10^4$  cells/scaffold (group 5). The *in vitro* cell  
42 distribution, morphology, osteogenic differentiation, and fluorescence images of groups 4 and 5  
43 were analyzed. Two animals were sacrificed at 1, 2, 3, and 4 weeks after transplantation. The *in*  
44 *vivo* fluorescence imaging and quantification data showed that EGFP-pMSCs were represented  
45 in the scaffolds in groups 4 and 5 throughout the whole regenerative period. A higher seeded cell  
46 density resulted in more sustained seeded cells in bone regeneration compared to a lower seeded  
47 cell density. Host cells were recruited by seeded cells if enough space was available in the  
48 scaffold. Host cells in groups 1 to 3 did not change from the 1st week to 4th week, which

49 indicates that the scaffold without seeded cells cannot recruit host cells even when enough space  
50 is available for cell ingrowth. The histological and immunohistochemical data showed that more  
51 cells were involved in osteogenesis in scaffolds with seeded cells.

52 **Conclusion:** Our *in vivo* results showed that more seeded cells recruit more host cells and  
53 that both cell types participate in osteogenesis. These results suggest that scaffolds without  
54 seeded cells may not be effective in bone transplantation.

55

## 56 **Introduction**

57           Skeletal defects require surgery using bone grafts. Autografts are the gold standard for  
58 bone grafting [1]; however, donor site morbidity and the limited amount of available donor tissue  
59 restrict their application [2, 3]. Regenerative tissue engineering using cells, scaffolds, factors and  
60 blood supply [4] has become an alternative method to treat skeletal bone defects.

61           Allografts may provide the same osteoconductive conduit for bony fusion as traditional  
62 autografts and may have comparable biomechanical properties without amount restriction [5, 6].  
63 Although depleted of osteoprogenitor cells like mesenchymal stem cells (MSCs), the fusion rate  
64 still reaches 73% to 100% in instrumented spinal fusion [7-16], making allograft a clinically  
65 feasible alternative form of fusion. The role of cells in allograft prompted us to wonder if seeded  
66 cells are necessary in bone regeneration clinically.

67           MSCs are undifferentiated multipotent cells with the capacity to differentiate into  
68 osteoblasts, chondrocytes, adipocytes, fibroblasts, and other tissues of mesenchymal origin [17].  
69 MSCs lack expression of costimulatory molecules like CD40, CD80, and CD86, which makes  
70 them largely non-immunogenic [18], as supported by evaluations of their immunosuppressive  
71 properties using mitogen proliferation assays [19]. Due to these suitable transplantation  
72 properties, MSCs are an important material in developmental biology and transgenic methods, as  
73 well as in potential clinical applications in tissue engineering and gene therapy [20, 21].

74           Some studies have found that seeded MSCs may be capable of releasing major growth  
75 factors, reducing the immune response, mobilizing the host's cells or eventually directly

76 differentiating into osteoblasts [22-25]. The expansion, proliferation, migration, viability and  
77 osteogenic differentiation of MSCs on different types of scaffolds have been shown in studies  
78 [26-31], but the role of seeded MSCs is still poorly addressed. Histologically, it is difficult for us  
79 to distinguish cells in the regenerative construct from seeded MSCs or from host MSCs via the  
80 host blood supply. In this study, we transplanted EGFP pig MSCs into calvarial defect of DsRed  
81 pigs. The cell distribution and proportion were distinguished by different fluorescent colors  
82 throughout the whole regenerative period.

83         The purpose of the present study was to clarify the distribution and proportion of seeded  
84 cells and host cells by tracking two fluorescent cells in the same scaffold in a pig critical-sized  
85 calvarial defect model.

## 87 **Materials and methods**

### 89 **EGFP-pMSCs culture in the scaffold**

#### 91 **Scaffold**

92         A hemostatic gelatin sponge, Spongostan™ (Ferrosan Medical Device, MS0003,  
93 thickness 0.1 cm), was used as the 3D scaffold [32]. Scanning electron microscopy (SEM)  
94 (Hitachi, SU8220) analysis indicated a mean pore size of approximately  $148 \pm 62 \mu\text{m}$  (Fig 1). To  
95 perform transplantation, the scaffolds were cut into disks with a diameter of 0.8 cm, sterilized by

96 75 % (v/v) ethanol and washed three times with phosphate-buffered saline. The sterile scaffold  
97 disks were then immersed in Opti-MEM medium (Gibco) before use.

98 **Fig 1. Morphology of the scaffold.**The Hemostatic Gelatin Sponge, Spongostan™ (Ferrosan  
99 Medical Device, MS0003, Thickness 0.1 cm) was used as the 3D Scaffold and determined by  
100 SEM (Scanning Electron Microscopy) to have a mean pore size of approximately  $148 \pm 62 \mu\text{m}$ .  
101 Increased magnification was observed from A to C.

102

### 103 **Cell culture**

104 Passage 5 EGFP-pMSCs [19] were cultured in minimum essential medium alpha (MEM-  
105  $\alpha$ ) (Gibco) supplemented with 10% fetal bovine serum (HyClone) and antibiotic solutions (100  
106 U/mL penicillin, 100  $\mu\text{g}/\text{mL}$  streptomycin, 50  $\mu\text{g}/\text{mL}$  gentamicin and 250 ng/mL fungizone)  
107 (Gibco). The cells were maintained in a humidified 37 °C incubator supplied with 5 % CO<sub>2</sub>.

108

### 109 **Seeding of cells**

110 The sterile scaffold disks were individually placed onto the wells of a 48 well-plate. The  
111 cell seeding density was  $5 \times 10^3$  or  $5 \times 10^4$  cells/disk. Cells in 50  $\mu\text{L}$  of medium were seeded  
112 throughout the surface of the scaffold disk and incubated for 3 hours to allow cell attachment  
113 before the addition of medium. The culture condition was observed by fluorescent microscopy  
114 and recorded until the 28<sup>th</sup> day after seeding onto scaffolds.

115

## 116 ***In vitro* cell distribution and morphology analysis**

117 The cell scaffold constructs were washed twice with phosphate buffered saline (PBS;  
118 GIBCO™, Invitrogen Corp., Carlsbad, CA) and fixed in 1.5% v/v glutaraldehyde in 0.14M  
119 sodium cacodylate (pH 7.4) for 30 mins at room temperature. Dehydration was performed by  
120 sequential immersion in serial diluted ethanol solutions of 50, 60, 70, 80, 90, and 100% v/v. The  
121 samples were then transferred to hexamethyldisilazane and air-dried at room temperature  
122 overnight. The cell distribution and morphology were analyzed by SEM and confocal laser  
123 scanning microscopy (CLSM) (Bio-Rad MRC 600).

124

## 125 ***In vitro* osteogenic differentiation**

126 The above two groups then received 0.5 mL/well of osteogenic induction medium (OIM)  
127 to promote cell differentiation. The OIM medium was composed of complete MEM- $\alpha$  medium  
128 enriched with  $10^{-7}$  M dexamethasone (Sigma), 10 mM  $\beta$ - glycerophosphate (Sigma) and 50  
129  $\mu$ g/mL ascorbic acid (Sigma) [32]. The OIM medium was replenished every two or three days  
130 for a total of 7 days. The osteogenic potential was assessed using an alkaline phosphatase  
131 staining and Alizarin red S (ARS) staining.

132

## 133 **Alkaline phosphatase staining and quantification**

134 The osteogenic potential was assessed using an ALP assay kit (BioVision K412-500)  
135 after 7 days. The cells were washed twice with ice-cold PBS and lysed using 300  $\mu$ L of RIPA

136 (radioimmunoprecipitation assay) lysis buffer (Sigma-Aldrich Corp., St Louis, MO, USA) for 5  
137 mins on ice. The cells were then rapidly scraped from the plate, and the cell lysates/RIPA buffer  
138 were transferred to a 1.5-mL microcentrifuge tube on ice for 20 min, followed by centrifugation  
139 at 8000 g for 10 min at 4 °C. The supernatant was then added to a new 1.5-mL microcentrifuge  
140 tube and stored at -20 °C. 50 µL of 5 mM pNPP solution was added to each well containing the  
141 test samples and the aliquots were incubated for 60 min at 25 °C while protected from light.  
142 Subsequently, 20 µL of the stop solution was added to terminate the ALP activity in the sample.  
143 The absorbance at 405 nm was measured with a spectrophotometer (UV-Vis 8500). Then, the  
144 ALP activity was calculated using the following formula: ((optical density – mean optical density  
145 of the control wells) × total volume × dilution)/(18.45 × sample volume).

146

## 147 **Alizarin red S (ARS) staining and quantification**

148 Cells cultured on the discs at different time points were washed twice with PBS and fixed  
149 with 4% paraformaldehyde for 15 min. The fixative was removed, and the discs with cells were  
150 rinsed with deionized water. The scaffolds were stained with a 2% ARS staining kit (ScienCell)  
151 for 5 mins to clarify the calcium deposits. The staining solution was discarded, and the scaffolds  
152 were carefully washed with deionized water to remove excess stain. The staining results were  
153 captured with a digital camera. To quantify the staining of each scaffold, 1 mL/disc of 10 wt%  
154 cetylpyridinium chloride (Sigma) was added to the discs. The discs were left on an orbital shaker  
155 (speed, 60 rpm) for 1 h to completely resolve the dye from the discs. Finally, 100 µL of the



156 dissolved solution from each scaffold was placed into a well of a 96-well plate, and the  
157 absorbance was measured at 540 nm with an ELISA reader.

158

## 159 ***In vivo* experimental design**

160 Eight adult domestic Ds-Red pigs (average age of  $15 \pm 3$  months) with a mean weight of  
161  $100 \pm 20$  kgs were obtained from the Department of Animal Science, National Taiwan University  
162 (Taipei, Taiwan). This study was carried out in strict accordance with the recommendations in  
163 the *Guide for the Care and Use of Laboratory Animals* of the National Institutes of Health. All  
164 animals were used under approved animal protocols by the Institutional Animal Care and Use  
165 Committee of National Taiwan University (NTU107-EL-00128) and housed accordingly.

166 The five treatment modalities were empty defects without scaffold (group 1; n=1);  
167 defects filled with only scaffold (group 2; n=1); defects filled with osteoinduction medium-  
168 loaded scaffold (group 3; n=1); defects filled with  $5 \times 10^3$  cells/scaffold (group 4; n=2) and  
169 defects filled with  $5 \times 10^4$  cells/scaffold (group 5; n=2).

170 Seven defects were created in each animal. The treatment modalities of the defects were  
171 determined for each animal separately by a randomization chart.

172

## 173 **Operation**

174 Zoletil® (5 mg/kg body weight) was injected in the neck area of the pig intramuscularly  
175 as a sedative. All experimental procedures were performed under a standard anesthetic/ analgesic

176 protocol as described in previous studies [19, 33].

177         The frontal bone was exposed after a standard sagittal approach in the forehead region.  
178 Identical bony defects were then created with a saline-cooled trephine burr (diameter 8 mm,  
179 depth 2 mm) meeting the requirements for a critical size defect in pigs [34]. The defects were  
180 positioned at least 5 mm apart to minimize biological interactions [35]. The internal plate of the  
181 neurocranium remained completely intact during the procedure. After well hemostasis, the  
182 scaffold was implanted (Fig 2). The periosteum and skin over the defects were sutured in two  
183 layers with resorbable material (Vicryl USP 3-0; Vicryl USP1-0; Ethicon Johnson & Johnson,  
184 NJ, USA).

185 **Fig 2. Critical-sized calvarial defects of DsRed pig were created.** The frontal bone was  
186 exposed after a standard sagittal approach in the forehead region. Seven identical bony defects  
187 were created in the frontal bone and the defects were positioned at least 5mm apart to minimize  
188 biological interactions. The internal plate of the neurocranium remained completely intact during  
189 the procedure. After adequate hemostasis, the scaffolds were implanted.

190

## 191 **Sacrifice and preparation of specimens**

192         Two animals were sacrificed 1, 2, 3, and 4 weeks after transplantation. The animals were  
193 anesthetized by intramuscular injection of tiletamine-zolazepam and atropine and then were  
194 euthanized with a lethal injection of sodium pentobarbital. The frontal bone was en bloc resected,  
195 and the calvarial defects were retrieved separately using an oscillating autopsy saw. The

196 retrieved specimens were fixed in 10% neutral formalin for further survey.

197

## 198 ***In vivo* fluorescence imaging**

199 All samples were washed twice with PBS, fixed in 4% v/v formaldehyde (methanol-free;  
200 Polyscience) for 15 min, permeabilized with 0.1% v/v Triton X-100 for 5 min, and incubated in  
201 10 mg/mL bovine serum albumin and 100 g/mL RNase for 45 min at room temperature. F-actin  
202 filaments were stained with Alexa Fluor-conjugated phalloidin (Molecular Probes) for 20 min,  
203 and nuclei were counterstained with 10 g/mL propidium iodide (Sigma) for 10 min. Finally, the  
204 samples were washed with PBS and mounted in Vectashield®. CLSM images were acquired on  
205 a BioRad MRC 600 microscope. The quantitative distribution of the two types of fluorescent  
206 cells was analyzed by using NIH Image J software (National Institutes of Health, USA) and  
207 presented as the modified integrated density (Modified IntDen). The modified integrated density  
208 was calculated based on the selected Integrated Density - (Area of selected cell × Mean  
209 fluorescence of background readings).

210

## 211 **Histology**

212 The tissue samples were processed to obtain non-decalcified ground sections. After 2  
213 weeks in 10% neutral formalin, the specimens were rinsed in running tap water, trimmed,  
214 dehydrated in ascending concentrations of ethanol, and embedded in methyl methacrylate. The  
215 embedded tissue blocks were serially cut into 5- $\mu$ m-thick ground sections using a microtome

216 (Leica SM 2000; Germany) and mounted on glass slides. Ten cross-sections from the middle of  
217 each implant were stained with hematoxylin-eosin and Masson's trichrome and visualized using  
218 an optical microscope (DXM200F Digital Camera; Nikon, Tokyo, Japan).

219

## 220 **Immunohistochemistry of CD68**

221 After fixation in formalin, the dissected blocks were decalcified for 11 days in 10%  
222 EDTA and subsequently embedded in paraffin. In brief, after removal of the embedding material,  
223 endogenous peroxidases were blocked with H<sub>2</sub>O<sub>2</sub>. Semi-thin sections were rinsed in saline and  
224 incubated in phosphate-buffered citrate solution, pH 7.4 (Sigma-Aldrich Corp., St Louis, MO,  
225 USA), for 20 min in the microwave and rinsed with phosphate-buffered saline. A microtome was  
226 used to obtain 3-mm-thick sections. Immunohistochemistry analysis of tissue labelled with anti-  
227 CD68 was performed with purified ab81289 (Abcam Inc., Cambridge, MA) at 1:250. Heat-  
228 mediated antigen retrieval was performed using Tris/EDTA buffer pH 9.0 (Abcam Inc.,  
229 Cambridge, MA). Goat Anti-Rabbit IgG H&L (HRP) was used as the secondary antibody at  
230 1/500. The negative control used PBS instead of the primary antibody, and counterstaining was  
231 performed with hematoxylin. The qualitative analysis was performed using a light microscope  
232 (Nikon Eclipse E600).

233

## 234 **Statistical analysis**

235 All experimental results are expressed as the mean  $\pm$  SD, and the statistical analysis was

236 performed using Student's t-test and two-way ANOVA. Analysis of variance (ANOVA) was  
237 performed by using Statistica 6.0 software (Statsoft, Tulsa, OK, USA). Differences with a p  
238 value of  $< 0.05$  were considered statistically significant.

239

## 240 **Results**

241

### 242 ***In vitro* characterization of EGFP-pMSCs**

243 Passage 5 EGFP-pMSCs [20] were collected by incubation with 0.25% trypsin-EDTA for  
244 5 min at 37°C and re-suspended in ice-cold washing buffer consisting of PBS with 2% FBS.  
245 Phase-contrast images of EGFP-MSCs showed a change from a round-shaped to a spindle-  
246 shaped morphology after culture for 1 day. After 2 days of culture, 90% confluence was reached,  
247 and the cells were trypsinized and re-plated at a dilution of 1:3. These EGFP-pMSCs proliferated  
248 rapidly and harbored a greater abundance of EGFP expression by fluorescence microscopy (Fig  
249 3).

250 **Fig 3. Cell culture of EGFP-MSCs.** Phase-contrast image of passage 5 EGFP-MSCs showing  
251 the change from round-shaped to spindle-shaped morphology after culture for 1 day (Upper  
252 Row). After 2 days of culture, 90% confluence was reached, and the cells were trypsinized and  
253 re-plated at a dilution of 1:3. These EGFP-pMSCs proliferated rapidly and harbored a greater  
254 abundance of EGFP expression according to fluorescence microscopy (lower row).

255

## 256 ***In vitro* fluorescence evaluation**

257           The sterile scaffolds were individually placed onto the wells of a 48 well-plate. The cell  
258 seeding density was  $5 \times 10^3$  or  $5 \times 10^4$  cells/scaffold in  $50 \mu\text{L}$  of medium, and the cells were  
259 seeded throughout the top side of the scaffold and then incubated for 3 h to allow cell attachment  
260 before adding the maintenance medium. From day 3, osteoinduction medium was added, and  
261 increasing expression of green fluorescence from day 3 to day 28 was observed in both groups  
262 by fluorescent microscopy, especially in the  $5 \times 10^4$  group (Fig 4).

### 263 **Fig 4. *In vitro* fluorescence evaluation of two different loading density in the scaffolds.**

264 An increase in the expression of green fluorescence was observed from day 3 to day 28 in both  
265 groups by fluorescence microscopy, especially in the  $5 \times 10^4$  group.

266

## 267 ***In vitro* cell distribution and morphology analysis**

268           SEM analysis showed that this biodegradable and biocompatible scaffold [36] with a  
269 mean pore size of approximately  $148 \pm 62 \mu\text{m}$  was suitable for growth of the EGFP-pMSCs. The  
270 intensity of live cells increased from day 3 to 28, indicating sufficient intricate space available  
271 for ingrowth. SEM images indicated that the EGFP-pMSCs spread on the sponge, and cellular  
272 extension and networks were observed. The connected pores were nearly covered by cells by day  
273 21 in the  $5 \times 10^4$  group and by day 28 in the  $5 \times 10^3$  group (Fig 5). CLSM images of the *in vitro*  
274 distribution of EGFP-pMSCs in the scaffolds were obtained from day 3 to day 28 (Fig 6). The  
275 constructs were washed with PBS and mounted in Vectashield®. CLSM images were acquired

276 on a BioRad MRC 600 microscope (100X). Three-dimensional z-stack images were evaluated  
277 and merged. The distribution of green fluorescence in both groups corresponded to the cell  
278 density, especially in the surface view (Fig 6A). In the cross section of the scaffold (Fig 6B),  
279 cells were distributed into the scaffold from the surface to the center from day 3 to day 28. On  
280 day 28, more cells were observed in the central area in the  $5 \times 10^4$  group than the  $5 \times 10^3$  group,  
281 and the space seemed to be sufficient for cell growth in both groups.

282 **Fig 5. *In vitro* SEM analysis.** SEM images indicated that the EGFP-pMSCs (yellow heads)  
283 spread on the sponge, and cellular extension and networks between them were observed from  
284 day 7 to day 28 in both groups. The connected pore was nearly covered by cells at day 21 in the  
285  $5 \times 10^4$  group and day 28 in the  $5 \times 10^3$  group.

286 **Fig 6. CLSM images of the *in vitro* distribution of EGFP-pMSCs in the scaffolds.** The green  
287 fluorescence distribution in both groups corresponded to the cell density, especially in the  
288 surface view (A). In the cross section of the scaffold (B), cells were distributed into the scaffold  
289 from the surface to the center from day 3 to day 28.

290

## 291 ***In vitro* osteogenic differentiation**

292

## 293 **Alkaline phosphatase staining and quantification**

294 The alkaline phosphatase staining results on the culture plates were observed by  
295 microscopy (Fig 7A). Both groups showed slight positive staining on day 7, and the relative

296 staining intensity increased on days 14, 21, and 28 compared to days 0 and 7 in the  $5 \times 10^3$  cell  
297 group. In the  $5 \times 10^4$  cell group, the staining intensity increased significantly from day 7. In both  
298 groups, the staining intensity continued to slowly increase steadily from day 21 to day 28.  
299 Alkaline phosphatase is an early marker of bone formation, and the level increased significantly  
300 in the first 2 weeks, followed by a slow steady increase until day 28. Alkaline phosphatase  
301 activity (Fig 7B) showed that the cells seeded in the two groups were able to produce alkaline  
302 phosphatase on days 7, 14, 21, and 28, and the enzyme activity was significantly higher in the  
303  $5 \times 10^4$  group than the  $5 \times 10^3$  group between days 7 and 28 (\*\*  $p < 0.01$ , \*\*\*  $p < 0.001$ ), indicating  
304 higher osteoblast differentiation in the  $5 \times 10^4$  group.

### 305 **Fig 7. Alkaline phosphatase staining and quantification analysis**

306 Microscopy observation of alkaline phosphatase staining results on the culture plates (A). Both  
307 groups showed slight positive staining on day 7, and the relative staining intensity increased on  
308 days 14, 21, and 28 compared to Days 0 and 7 in the  $5 \times 10^3$  cell group. In the  $5 \times 10^4$  cell group,  
309 the staining intensity increased significantly from day 7. Alkaline phosphatase activity (B)  
310 showed the enzyme activity was significantly higher in the  $5 \times 10^4$  group than the  $5 \times 10^3$  group  
311 from days 7 to 28 (\*\*  $p < 0.01$ , \*\*\*  $p < 0.001$ ), indicating higher osteoblast differentiation in the  
312  $5 \times 10^4$  group. Data is shown as mean  $\pm$  standard deviation.

313

### 314 **Alizarin red S (ARS) staining and quantification**

315 Alizarin red S staining (Fig 8A) is indicative of bone mineralization and was negative on



316 day 7 in both groups. Up to day 14, all groups showed positive staining with a deep red color,  
317 indicating bone nodule formation. The alizarin red staining quantification assay (Fig 8B) was  
318 performed at different time points, and the absorbance was measured at 540 nm using an ELISA  
319 reader. The absorbance value significantly increased from day 7 to days 14, 21 and 28. The  
320 values were significantly higher in the  $5 \times 10^4$  group than in the  $5 \times 10^3$  group on day 14 and 21  
321 ( $p < 0.05$ ), consistent with the results of alkaline phosphatase staining.

### 322 **Fig 8. Alizarin red S staining and quantification analysis**

323 Alizarin red S staining (A) was negative on day 7 in both Groups. Up to day 14, all groups  
324 showed positive staining with deep red color, indicating bone nodule formation. Alizarin red  
325 staining quantification assays (B) were performed at different time points. The absorbance value  
326 increased significantly from day 7 to days 14, 21 and 28. The values were significantly higher in  
327 the  $5 \times 10^4$  group than in the  $5 \times 10^3$  group on day 14 and 21. Differences considered significant at  
328 \*  $p < 0.05$  were marked. Data is shown as mean  $\pm$  standard deviation.

329

### 330 ***In vivo* fluorescence imaging**

331 Confocal laser scanning microscopy was performed to image groups 1 through 5 from  
332 week 1 to week 4. (Fig 9). EGFP-pMSCs were present in the scaffolds in groups 4 and 5 through  
333 the whole period. Although the EGFP expression decreased in the third and fourth weeks, DsRed  
334 expression increased in groups 4 and 5. The green fluorescence was higher in group 5 than in  
335 group 4 at each time point, similar to the *in vitro* fluorescence imaging results (Fig 6A).

336 DsRed expression was significantly higher in groups 2 and 3 than in group 1 at each time point,  
337 which indicated that the empty scaffold facilitates DsRed cells ingrowth. Even at week 4, no  
338 sufficient two fluorescent cells were observed in group 1, which indicates that this type of  
339 calvarial defect cannot heal spontaneously during the bone healing period used in our  
340 experiments.

341

342 **Fig 9. CLSM image of group 1 to 5 from week 1 to week 4.** EGFP-pMSCs were present in the  
343 scaffolds in groups 4 and 5 from week 1 to week 4. Although EGFP expression decreased in the  
344 third and fourth weeks, DsRed expression was increased in groups 4 and 5. Green fluorescence  
345 was higher in group 5 than in group 4 at each time point, similar to the *in vitro* fluorescence  
346 distribution result. DsRed expression was significantly higher in groups 2 and 3 than in group 1  
347 at each time point, which indicated that the empty scaffold facilitates DsRed cells ingrowth.  
348 Even at week 4, no sufficient two fluorescent cells were observed in group 1.

349

### 350 ***In vivo* fluorescence quantification**

351 The modified integrated density of green and DsRed fluorescence in the acquired images  
352 was measured using Image J and expressed as bar graphs (Fig 10). EGFP expression (Fig 10A)  
353 was higher in Groups 4 and 5 than in the other three groups from the 1<sup>st</sup> week to the 3<sup>rd</sup> week  
354 ( $p<0.05$ ;  $p<0.01$ ) and was significantly highest in group 5 in the 4<sup>th</sup> week ( $p<0.05$ ). These results  
355 indicate that the seeded cells were present in the scaffold and that the higher load of seeded cells

356 was sustained until the 4<sup>th</sup> week. The results of the *in vivo* study were compatible with those of  
357 the *in vitro* study. By the 4<sup>th</sup> week, EGFP expression in Group 4 decreased to the levels in  
358 Groups 1-3, which means that an insufficient number of seeded cells may not be effective for  
359 tissue transplantation. EGFP expression was highest in the 2<sup>nd</sup> week, which means that the  
360 proliferation of seeded cells reached its highest peak, consistent with the *in vitro* ALP/ARS  
361 staining results (Figs 7 and 8).

362 In the 1<sup>st</sup> week, DsRed expression (Fig 10B) was higher in Group 4 than in the other  
363 groups, indicating that recruitment of host cells was facilitated by the scaffold seeded with a  
364 lower density of cells compared with the empty scaffold or scaffold seeded with a higher density  
365 of cells. DsRed expression decreased from the 1<sup>st</sup> week to 4<sup>th</sup> week in group 4 but increased in  
366 group 5, which means that more EGFP pMSCs can recruit more host cells 2 weeks after  
367 transplantation and that enough available space and higher cell loading can benefit tissue  
368 regeneration. The DsRed expression in groups 1 to 3 did not increase from the 1<sup>st</sup> week to 4<sup>th</sup>  
369 week, indicating that the empty scaffold attracted host cells only in the first week after  
370 transplantation and implying that scaffolds without seeded cells may not be effective for tissue  
371 transplantation. Osteogenic differentiation may be responsible for the decreased expression of  
372 EGFP and DsRed expression from week 2 to week 4 in groups 4 and 5.

373 **Fig 10. *In vivo* fluorescence quantification.**

374 EGFP (A) and DsRed (B) expression using Modified IntDen in Group 1 to 5 from week 1 to 4  
375 were demonstrated as bar chart. Differences considered significant at \*  $p < 0.05$ , \*\*  $p < 0.01$ , and

376 \*\*\*  $p < 0.001$  respect to control. Data is shown as mean  $\pm$  standard deviation.

377

## 378 **Histological analysis**

379 Hematoxylin and eosin staining and Masson's trichrome staining were analyzed using a  
380 light microscope at various levels of magnification.

381 A greater number of cells were stained with H&E in groups 4 and 5 compared to groups  
382 1-3 in the first week (Figs 11). In the fourth week, obvious deposition of osteoids (yellow  
383 arrowhead) was noted in group 5. Calcification of the osteoids led to the formation of primitive  
384 trabecular bone in group 5 compared with group 4 in the fourth week. In Groups 1-3, cells were  
385 sustained until the fourth week, but no obvious osteoids were found in the 4<sup>th</sup> week.

386 **Fig 11. *In vivo* Hematoxylin and eosin staining.** A greater number of cells were stained  
387 with H&E in groups 4 and 5 compared to groups 1-3 in the first week (yellow arrow).Osteoid  
388 formation was confirmed histologically in the hematoxylin and eosin-stained defect of group 4  
389 and 5 at 4 weeks postoperatively (yellow arrowhead). Staining was observed in all groups in  
390 400 $\times$  magnification.

391 Masson's trichrome staining of cells increased in all groups in week 1 through 4, but  
392 blue-colored osteoid-like tissue was only found in groups 4 and 5 after the third week (Fig 12).  
393 In the 4<sup>th</sup> week, connective fibrous tissue with a large amount of undifferentiated cells was noted  
394 in groups 1, 2, and 3 (yellow arrowhead). Meanwhile, in groups 4 and 5, thick dense fibrous  
395 connective tissue with differentiated osteoblast-like cells (yellow arrow) was noted.

396 **Fig 12. *In vivo* Masson's trichrome staining.** Blue-colored osteoid-like tissue was only  
397 found in groups 4 and 5 after the third week. In the 4<sup>th</sup> week, in groups 4 and 5, thick dense  
398 fibrous connective tissue with differentiated osteoblast-like cells (yellow arrow) was noted but  
399 only a large amount of undifferentiated cells (yellow arrowhead) without obvious blue-colored  
400 osteoid-like tissue in groups 1, 2, and 3 . Staining was observed in all groups in 400×  
401 magnification.

402

403

## 404 **Immunohistochemistry of CD68**

405 The levels of the macrophage marker [37] CD68 were higher in groups 4 and 5 than in  
406 the other groups in the fourth week (Fig 12), especially around the neovascularization area. The  
407 increase in macrophages indicated an increase in osteoclasts and, consequently, more  
408 osteogenesis in groups 4 and 5.

409 **Fig 12. Immunohistochemistry of CD 68.** The macrophage marker were stained with anti-  
410 CD68 antibody and marked with yellow arrow in group 4 and 5 in week 4. The increasing  
411 arrows, CD 68, in group 5 than group 4 suggested that more neovascularization and thus more  
412 osteogenesis in group 5 than group 4 .

## 413 **Discussion**

414 Allografts may provide the same osteoconductive conduits for bony fusion as traditional  
415 autografts and may have comparable biomechanical properties [5, 6]. Although depleted of

416 osteoprogenitor cells like MSCs, the fusion rate still reaches 73% to 100% in instrumented spinal  
417 fusion [7-16], making allografts a clinically feasible alternative for fusion. Cells, scaffolds, and  
418 factors are the triad of regenerative engineering, and the lack of one of these three graft  
419 properties made us wonder about the role of seeded cells in bone regeneration.

420 A number of studies examining the combination of MSCs and 3-D scaffolds in bone  
421 regeneration have reported promising outcomes in animal critical size bone defects [38-43].  
422 These studies aimed to achieve the final result of bone repair by using different kinds of scaffolds  
423 [44], sources of MSCs [45] or loaded factors [46-48], but very few studies have focused on the  
424 role of the seeded cells.

425 Kuznetsova et al. [49] used allogenic transplantation of mice MSCs loaded on fabricated  
426 3-D scaffolds made from poly (D, L)-lactic acid and hydroxyapatite in the calvarial defect. They  
427 divided the mice into two experimental groups: GFP (+) mice MSCs transplanted into GFP (-)  
428 mice and GFP(-) mice MSCs transplanted into GFP(+)mice; the scaffold without cells was used  
429 as the control. Fluorescence imaging and histology revealed only allogeneic cells on the scaffold  
430 after 6 weeks and 12 weeks, and newly formed bone-like tissue from seeded cells was detected  
431 by 12 weeks. The presence of vessels was confirmed by CD31 immunohistochemical staining,  
432 which indicated the possibility of vessel formation from seeded MSCs.

433 However, there were four major drawbacks of their study. First, the use of Hoechst stain  
434 in fluorescence imaging to indicate seeded or host cells is not reasonable because the GFP  
435 harvest of cells may decay after transplantation for 6 weeks or 12 weeks; cells with GFP may

436 also stain with blue color, providing misleading results about the origin of cells. Second, the  
437 surface view of fluorescence imaging cannot represent the actual cell interactions during bone  
438 regeneration inside the 3-D scaffold. Third, the creation of only one defect in each mouse cannot  
439 eliminate individual variations. Fourth, bone formation was supposed to be similar in both  
440 experimental groups. The authors explained that GFP itself may be immunogenic in  
441 immunocompetent mice; however, GFP was present in both groups.

442 To the best of the authors' knowledge, the present study is the first to compare the  
443 distribution and proportion of seeded cells and host cells by tracking two fluorescent cells in the  
444 same scaffold in a pig critical-sized calvarial defect model.

445 To eliminate individual variations in the animal study, we used a critical-sized calvarial  
446 defect in pigs instead of rats due to the limited size of rats. As an animal model, we chose the  
447 domestic pig because its bone regeneration rates correlate well with those found in humans (pigs  
448 1.2 -1.5 mm per day, humans 1.0 - 1.5 mm per day) [34]. Numerous experiments have been  
449 conducted to analyze bone formation with various scaffolds and factors in critical-sized calvarial  
450 defect pigs [50-52] because of the uniform, flat and surgically feasible calvarial bone. In general,  
451 a defect size with a diameter of at least 6mm is thought to be a reasonable critical-sized calvarial  
452 defect, and we also used an empty group (group 1) as a control.

453 The CAG hybrid promoter-driven EGFP-MSCs derived from the transgenic pigs used in  
454 this study have been proved to exhibit homogeneous surface epitopes and possess classic  
455 trilineage differentiation potential into osteogenic, adipogenic, and chondrogenic lineages, with

456 robust EGFP expression maintained in all differentiated progeny. These cells have the major  
457 advantage of greater sustained EGFP expression in stem cells and in all their differentiated  
458 progeny [19] compared to GFP expression in transgenic pigs under the control of housekeeping  
459 regulatory sequences [53,54]. Increased expression of green fluorescence was observed from day  
460 3 to day 28 after culture into scaffolds (Fig 4.and 6)

461 The transgenic Ds-Red pigs were produced by using pronuclear microinjection, and the  
462 transgene comprised a CMV enhancer/chicken-beta actin promoter and DsRed monomeric  
463 cDNA [33]. DsRed is a red fluorescent protein that was originally discovered in corals of the  
464 class Anthozoa. DsRed is expressed ubiquitously, with red fluorescence detected in the brain,  
465 eye, tongue, heart, lung, liver, pancreas, spleen, stomach, small intestine, large intestine, kidney,  
466 testis, and muscle, as confirmed by histology and western blot analyses. Red fluorescence  
467 tracking was previously applied in transplantation of neurons from Ds-Red transgenic pigs into a  
468 Parkinson's disease rat model [55]. In this *in vivo* experiment, precise evaluation and analysis  
469 could be achieved due to the abundant expression of the two fluorescent proteins in all  
470 differentiated progeny.

471 The hemostatic gelatin sponge, Spongostan<sup>TM</sup>, is prepared from purified type A pork  
472 skin, and its biosafety in clinical applications, especially to control bleeding during surgery, has  
473 long been proved [56, 57]. *In vivo* studies have shown good biocompatibility of Spongostan<sup>TM</sup>  
474 without any immune response during bone formation [36]. The main reasons that we chose this  
475 scaffold are its biocompatibility and biodegradation with MSCs and absence of autofluorescence



476 [36].

477 Our *in vivo* fluorescence analysis (Fig 9 and 10) showed that the green fluorescence in  
478 the scaffold loaded with seeded cells in groups 4 and 5 was significantly higher than that in the  
479 other groups from week 1 to week 4, which means that the seeded cells did play an important  
480 role in the osteogenic differentiation process. EGFP-pMSCs were highest in group 5 in the 4<sup>th</sup>  
481 week, which means that the higher load of seeded cells was sustained until the 4<sup>th</sup> week. DsRed  
482 expression (Fig10) was highest in Group 4 in the 1<sup>st</sup> week, indicating that recruitment [58, 59] of  
483 host cells was facilitated in the lower density-seeded scaffold than the empty scaffold or higher  
484 density-seeded scaffold. DsRed expression decreased from the 1<sup>st</sup> week to 4<sup>th</sup> week in group 4  
485 but increased in group 5, which means that more EGFP-pMSCs can recruit more host cells in the  
486 following period and that enough available space and higher cell loading benefit tissue  
487 regeneration. The higher expression of EGFP and DsRed fluorescence in groups 4 and 5 were  
488 compatible with the histological results, which indicated more obvious deposition of osteoids in  
489 groups 4 and 5 in week 4. The immunohistochemical results for CD68 in week 4 also showed  
490 obvious osteogenesis in groups 4 and 5.

491 Our *in vivo* results demonstrated that the seeded MSCs promoted host cell migration,  
492 which contributed to the higher number of host cells in the transplanted scaffolds. In addition,  
493 according to the histological staining, we found that the percentage of osteoid formation in the  
494 scaffolds transplanted with seeded MSCs was significantly higher than that in the control group,  
495 which means that not only the transplanted seeded cells but also the recruited host cells

496 contributed to the entire process.

497           In summary, we found that more seeded cells recruit more host cells and that both cell  
498 types participate in osteogenesis. Recruitment of host cells was facilitated in the lower density-  
499 seeded scaffold than the empty scaffold or higher density-seeded scaffold in the first week but  
500 sustained recruitment of host cells was achieved in higher density-seeded scaffold and result in  
501 more obvious deposition of osteoids. Scaffolds without seeded cells may therefore not be  
502 effective in bone transplantation based on this *in vivo* study.

503

## 504 **Acknowledgments**

505           This work was supported by the Chang Gung Memorial Hospital (grant No.  
506 CMRPG3G2061 ; CMRPG3G0572). We would like to thank the Microscope Core Laboratory at  
507 the Center for Advanced Molecular Imaging and Translation and the Laboratory Animal Center  
508 of Linko Chang Gung Memorial Hospital.

509

## 510 **References**

- 511 1. Bhumiratana S, Vunjak-Novakovic G. Concise review: personalized human bone grafts  
512 for reconstructing head and face. *Stem Cells Transl Med.* 2012;1: 64-69.
- 513 2. Bauer TW, Muschler GF. Bone graft materials. An overview of the basic science. *Clin*  
514 *Orthop Relat Res.* 2000;371: 10-27.
- 515 3. Kuznetsova D, Timashev P, Bagratashvili VN, Zagaynova EV. Scaffold- and cell system-  
516 based bone grafts in tissue engineering (review). *Sovrem Tehnologii Med.* 2014;6: 201-  
517 211.
- 518 4. Chan BP, Leong KW. Scaffolding in tissue engineering: general approaches and tissue-  
519 specific considerations. *Eur Spine J.* 2008;17: 467-479.
- 520 5. Ryu SI, Lim JT, Kim S-M, Paterno J, Kim DH. Comparison of the biomechanical  
521 stability of dense cancellous allograft with tricortical iliac autograft and fibular allograft  
522 for cervical interbody fusion. *Eur Spine J.* 2006;15: 1339-1345.
- 523 6. Godzik J, Ravindra VM, Ray WZ, Schmidt MH, Bisson EF, Dailey AT. Comparison of  
524 structural allograft and traditional autograft technique in occipitocervical fusion:  
525 radiological and clinical outcomes from a single institution. *J Neurosurg Spine.* 2015;23:  
526 144-152.
- 527 7. Knapp DR, Jones ET, Blanco JS, Flynn JC, Price CT. Allograft bone in spinal fusion for  
528 adolescent idiopathic scoliosis. *J Spinal Disord Tech.* 2005;18: S73-S76.
- 529 8. Jones KC, Andrish J, Kuivila T, Gurd A. Radiographic outcomes using freeze-dried

- 530 cancellous allograft bone for posterior spinal fusion in pediatric idiopathic scoliosis. J  
531 *Pediatr Orthop*. 2002;22: 285-289.
- 532 9. Cabraja M, Kroppenstedt S. Bone grafting and substitutes in spine surgery. *J Neurosurg*  
533 *Sci*. 2012;56: 87-95.
- 534 10. Rihn JA, Kirkpatrick K, Albert TJ. Graft options in posterolateral and posterior interbody  
535 lumbar fusion. *Spine*. 2010;35: 1629-1639.
- 536 11. Andersen T, Christensen FB, Niedermann B, Helmig P, Hoy K, Hansen ES, et al. Impact  
537 of instrumentation in lumbar spinal fusion in elderly patients: 71 patients followed for 2-7  
538 years. *Acta Orthop*. 2009;80: 445-450.
- 539 12. Ploumis A, Albert TJ, Brown Z, Mehbod AA, Transfeldt EE. Healos graft carrier with  
540 bone marrow aspirate instead of allograft as adjunct to local autograft for posterolateral  
541 fusion in degenerative lumbar scoliosis: a minimum 2-year follow-up study. *J Neurosurg*  
542 *Spine*. 2010;13: 211-215.
- 543 13. Arnold PM, Robbins S, Paullus W, Faust S, Holt R, McGuire R. Clinical outcomes of  
544 lumbar degenerative disc disease treated with posterior lumbar interbody fusion allograft  
545 spacer: a prospective, multicenter trial with 2-year follow-up. *Am J Orthop (Belle Mead*  
546 *NJ)*. 2009;38: E115-E122.
- 547 14. Slosar PJ, Josey R, Reynolds J. Accelerating lumbar fusions by combining rhBMP-2 with  
548 allograft bone: a prospective analysis of interbody fusion rates and clinical outcomes.  
549 *Spine J*. 2007;7: 301-307.

- 550 15. Faundez AA, Schwender JD, Safriel Y, Gilbert TJ, Mehdod AA, Denis F, et al. Clinical  
551 and radiological outcome of anterior-posterior fusion versus transforaminal lumbar  
552 interbody fusion for symptomatic disc degeneration: a retrospective comparative study of  
553 133 patients. *Eur Spine J.* 2009;18: 203-211.
- 554 16. Buser Z, Brodke DS, Youssef JA, Rometsch E, Park JB, Yoon ST, et al. Allograft versus  
555 demineralized bone matrix in instrumented and noninstrumented lumbar fusion: a  
556 systematic review. *Global Spine J.* 2018;8: 396-412.
- 557 17. Ohyama M, Okano H. Promise of human induced pluripotent stem cells in skin  
558 regeneration and investigation. *J Invest Dermatol.* 2014;134: 605-609.
- 559 18. Michel J, Penna M, Kochen J, Cheung H. Recent advances in hydroxyapatite scaffolds  
560 containing mesenchymal stem cells. *Stem Cells Int.* 2015;2015: 1-13.
- 561 19. Hsiao FS, Lian WS, Lin SP, Lin CJ, Lin YS, Cheng EC, et al. Toward an ideal animal  
562 model to trace donor cell fates after stem cell therapy: production of stably labeled  
563 multipotent mesenchymal stem cells from bone marrow of transgenic pigs harboring  
564 enhanced green fluorescence protein gene. *J Anim Sci.* 2011;89: 3460-3472.
- 565 20. Arpornmaeklong P, Brown SE, Wang Z, Krebsbach PH. Phenotypic characterization,  
566 osteoblastic differentiation, and bone regeneration capacity of human embryonic stem  
567 cell-derived mesenchymal stem cells. *Stem Cells Dev.* 2009;18: 955-968.
- 568 21. Lee JY, Choo JE, Choi YS, Shim IK, Lee SJ, Seol YJ, et al. Effect of immobilized cell-  
569 binding peptides on chitosan membranes for osteoblastic differentiation of mesenchymal

- 570 stem cells. *Biotechnol Appl Biochem.* 2009;52: 69-77.
- 571 22. Amini AR, Laurencin CT, Nukavarapu SP. Bone tissue engineering: recent advances and  
572 challenges. *Crit Rev Biomed Eng.* 2012;40: 363-408.
- 573 23. Mauney JR, Volloch V, Kaplan DL. Role of adult mesenchymal stem cells in bone tissue  
574 engineering applications: current status and future prospects. *Tissue Eng.* 2005;11: 787-  
575 802.
- 576 24. Tasso R, Ulivi V, Reverberi D, Io Siccò C, Descalzi F, Cancedda R. *In vivo* implanted  
577 bone marrow-derived mesenchymal stem cells trigger a cascade of cellular events leading  
578 to the formation of an ectopic bone regenerative niche. *Stem Cells Dev.* 2013;22: 3178-  
579 3191.
- 580 25. Gamblin AL, Brennan MA, Renaud A, Yagita H, Lezot F, Heymann D, et al. Bone tissue  
581 formation with human mesenchymal stem cells and biphasic calcium phosphate ceramics:  
582 the local implication of osteoclasts and macrophages. *Biomaterials.* 2014;35: 9660-9667.
- 583 26. Kulkarni M, Greiser U, O'Brien T, Pandit A. Liposomal gene delivery mediated by  
584 tissue-engineered scaffolds. *Trends Biotechnol.* 2010;28: 28-36.
- 585 27. Lei Y, Segura T. DNA delivery from matrix metalloproteinase degradable poly(ethylene  
586 glycol) hydrogels to mouse cloned mesenchymal stem cells. *Biomaterials.* 2009;30: 254-  
587 265.
- 588 28. Sun XD, Jeng L, Bolliet C, Olsen BR, Spector M. Non-viral endostatin plasmid  
589 transfection of mesenchymal stem cells via collagen scaffolds. *Biomaterials.* 2009;30:

- 590 1222-1231.
- 591 29. Mulder G, Tallis AJ, Marshall VT, Mozingo D, Phillips L, Pierce GF, et al. Treatment of  
592 nonhealing diabetic foot ulcers with a platelet-derived growth factor gene-activated  
593 matrix (GAM501): results of a phase 1/2 trial. *Wound Repair Regen.* 2009;17: 772-779.
- 594 30. Sapet C, Formosa C, Sicard F, Bertosio E, Zelphati O, Laurent N. 3D-fection: cell  
595 transfection within 3D scaffolds and hydrogels. *Ther Deliv.* 2013;4: 673-685.
- 596 31. Villa MM, Wang L, Rowe DW, Wei M. Effects of cell-attachment and extracellular  
597 matrix on bone formation *in vivo* in collagen-hydroxyapatite scaffolds. *PLoS One.*  
598 2014;9: e109568.
- 599 32. Jensen J, Tvedesoe C, Rolfing JH, Foldager CB, Lysdahl H, Kraft DC, et al. Dental pulp-  
600 derived stromal cells exhibit a higher osteogenic potency than bone marrow-derived  
601 stromal cells *in vitro* and in a porcine critical-size bone defect model. *SICOT J.* 2016;2:  
602 16.
- 603 33. Chou C-J, Peng S-Y, Wu M-H, Yang C-C, Lin Y-S, Cheng WT-K, et al. Generation and  
604 characterization of a transgenic pig carrying a DsRed-monomer reporter gene. *PLoS One.*  
605 2014;9: e106864.
- 606 34. Schlegel KA, Lang FJ, Donath K, Kulow JT, Wiltfang J. The monocortical critical size  
607 bone defect as an alternative experimental model in testing bone substitute materials.  
608 *Oral Surg Oral Med Oral Pathol Oral Radiol Endod.* 2006;102: 7-13.
- 609 35. Wehrhan F, Amann K, Molenberg A, Lutz R, Neukam FW, Schlegel KA. PEG matrix

- 610 enables cell-mediated local BMP-2 gene delivery and increased bone formation in a  
611 porcine critical size defect model of craniofacial bone regeneration. *Clin Oral Implants*  
612 *Res.* 2012;23: 805-813.
- 613 36. Kuo Z-K, Lai P-L, Toh EK-W, Weng C-H, Tseng H-W, Chang P-Z, et al. Osteogenic  
614 differentiation of preosteoblasts on a hemostatic gelatin sponge. *Sci Rep.* 2016;6: 32884.
- 615 37. Hsieh M-K, Wu C-J, Chen C-C, Tsai T-T, Niu C-C, Wu S-C, et al. BMP-2 gene  
616 transfection of bone marrow stromal cells to induce osteoblastic differentiation in a rat  
617 calvarial defect model. *Mater Sci Eng C.* 2018;91: 806-816.
- 618 38. Mangano C, de Rosa A, Desiderio V, d'Aquino R, Piattelli A, de Francesco F, et al. The  
619 osteoblastic differentiation of dental pulp stem cells and bone formation on different  
620 titanium surface textures. *Biomaterials.* 2010;31: 3543-3551.
- 621 39. Ito K, Yamada Y, Nakamura S, Ueda M. Osteogenic potential of effective bone  
622 engineering using dental pulp stem cells, bone marrow stem cells, and periosteal cells for  
623 osseointegration of dental implants. *Int J Oral Maxillofac Implants.* 2011;26: 947-954.
- 624 40. Qin Y, Guan J, Zhang C. Mesenchymal stem cells: mechanisms and role in bone  
625 regeneration. *Postgrad Med J.* 2014;90: 643-647.
- 626 41. Patel D, Shah J, Srivastava A. Therapeutic potential of mesenchymal stem cells in  
627 regenerative medicine. *Stem Cells Int* 2013;49: 21-28.
- 628 42. Koob S, Torio-Padron N, Stark GB, Hannig C, Stankovic Z, Finkenzeller G. Bone  
629 formation and neovascularization mediated by mesenchymal stem cells and endothelial



- 630 cells in critical-sized calvarial defects. *Tissue Eng Part A*. 2011;17: 311-321.
- 631 43. Nassif L, Sabban M. Mesenchymal stem cells in combination with scaffolds for bone  
632 tissue engineering. *Materials (Basel)*. 2011;4: 1793-1804.
- 633 44. Kwon DY, Kwon JS, Park SH, Park JH, Jang SH, Yin XY, et al. A computer-designed  
634 scaffold for bone regeneration within cranial defect using human dental pulp stem cells.  
635 *Sci Rep*. 2015;5: 12721.
- 636 45. Kargozar S, Mozafari M, Hashemian SJ, Milan P, Hamzehlou S, Soleimani M, et al.  
637 Osteogenic potential of stem cells-seeded bioactive nanocomposite scaffolds: a  
638 comparative study between human mesenchymal stem cells derived from bone, umbilical  
639 cord Wharton's jelly, and adipose tissue. *J Biomed Mater Res B Appl Biomater*.  
640 2018;106: 61-72.
- 641 46. Raftery RM, Mencia-Castano I, Sperger S, Chen G, Cavanagh B, Feichtinger GA, et al.  
642 Delivery of the improved BMP-2-Advanced plasmid DNA within a gene-activated  
643 scaffold accelerates mesenchymal stem cell osteogenesis and critical size defect repair. *J*  
644 *Control Release*. 2018;283: 20-31.
- 645 47. Guo J, Wu G. The signaling and functions of heterodimeric bone morphogenetic proteins.  
646 *Cytokine Growth Factor Rev*. 2012;23: 61-67.
- 647 48. Annamalai RT, Turner PA, Carson WF, Levi B, Kunkel S, Stegemann JP. Harnessing  
648 macrophage-mediated degradation of gelatin microspheres for spatiotemporal control of  
649 BMP2 release. *Biomaterials*. 2018;161: 216-227.

- 650 49. Kuznetsova D, Prodanets N, Rodimova S, Antonov E, Meleshina A, Timashev P, et al.  
651 Study of the involvement of allogeneic MSCs in bone formation using the model of  
652 transgenic mice. *Cell Adh Migr.* 2016;11: 233-244.
- 653 50. Park J, Lutz R, Felszeghy E, Wiltfang J, Nkenke E, Neukam FW, et al. The effect on  
654 bone regeneration of a liposomal vector to deliver BMP-2 gene to bone grafts in peri-  
655 implant bone defects. *Biomaterials.* 2007;28: 2772-2782.
- 656 51. Stockmann P, Park J, von Wilmowsky C, Nkenke E, Felszeghy E, Dehner JF, et al.  
657 Guided bone regeneration in pig calvarial bone defects using autologous mesenchymal  
658 stem/progenitor cells - a comparison of different tissue sources. *J Craniomaxillofac Surg.*  
659 2012;40: 310-320.
- 660 52. Bornstein MM, Heynen G, Bosshardt DD, Buser D. Effect of two bioabsorbable barrier  
661 membranes on bone regeneration of standardized defects in calvarial bone: a comparative  
662 histomorphometric study in pigs. *J Periodontol.* 2009;80: 1289-1299.
- 663 53. Nowak-Imialek M, Kues WA, Petersen B, Lucas-Hahn A, Herrmann D, Haridoss S, et al.  
664 Oct4-enhanced green fluorescent protein transgenic pigs: a new large animal model for  
665 reprogramming studies. *Stem Cells Dev.* 2011;20: 1563-1575.
- 666 54. Yong HY, Hao Y, Lai L, Li R, Murphy CN, Rieke A, et al. Production of a transgenic  
667 piglet by a sperm injection technique in which no chemical or physical treatments were  
668 used for oocytes or sperm. *Mol Reprod Dev.* 2006;73: 595-599.
- 669 55. Chiu CH, Li IH, Weng SJ, Huang YS, Wu SC, Chou TK, et al. PET imaging of serotonin

- 670 transporters with 4-[(18)F]-ADAM in a parkinsonian rat model with porcine neural  
671 xenografts. *Cell Transplant*. 2016;25: 301-311.
- 672 56. Seo JP, Tsuzuki N, Haneda S, Yamada K, Furuoka H, Tabata Y, et al. Osteoinductivity of  
673 gelatin/beta-tricalcium phosphate sponges loaded with different concentrations of  
674 mesenchymal stem cells and bone morphogenetic protein-2 in an equine bone defect  
675 model. *Vet Res Commun*. 2014;38: 73-80.
- 676 57. Amjadian S, Seyedjafari E, Zeynali B, Shabani I. The synergistic effect of nano-  
677 hydroxyapatite and dexamethasone in the fibrous delivery system of gelatin and poly(l-  
678 lactide) on the osteogenesis of mesenchymal stem cells. *Int J Pharm*. 2016;507: 1-11.
- 679 58. Lin W, Xu L, Zwingenberger S, Gibon E, Goodman SB, Li G. Mesenchymal stem cells  
680 homing to improve bone healing. *J Orthop Translat*. 2017;9: 19-27.
- 681 59. Xu L, Huang S, Hou Y, Liu Y, Ni M, Meng F, et al. Sox11-modified mesenchymal stem  
682 cells (MSCs) accelerate bone fracture healing: sox11 regulates differentiation and  
683 migration of MSCs. *FASEB J*. 2015;29: 1143-1152.
- 684

**A**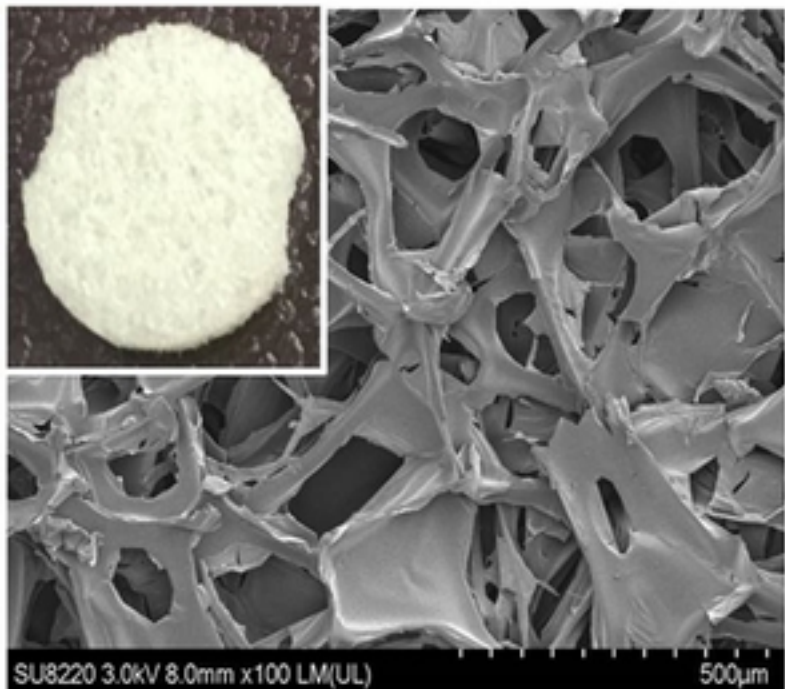**B**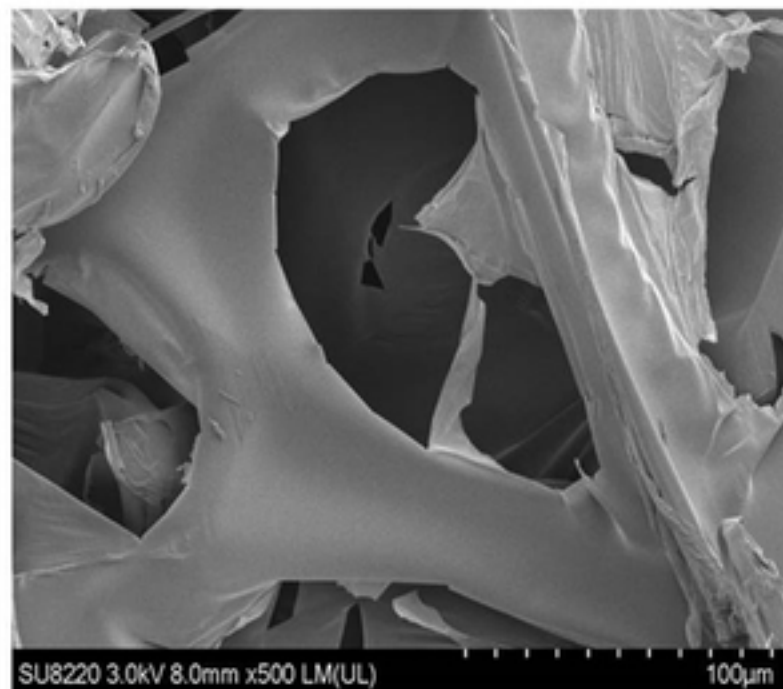**C**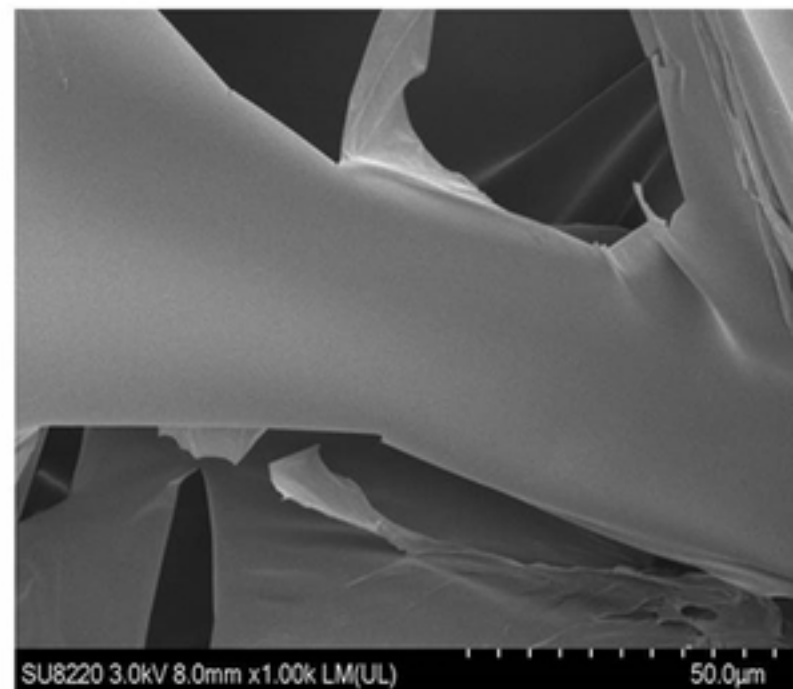

Figure 1



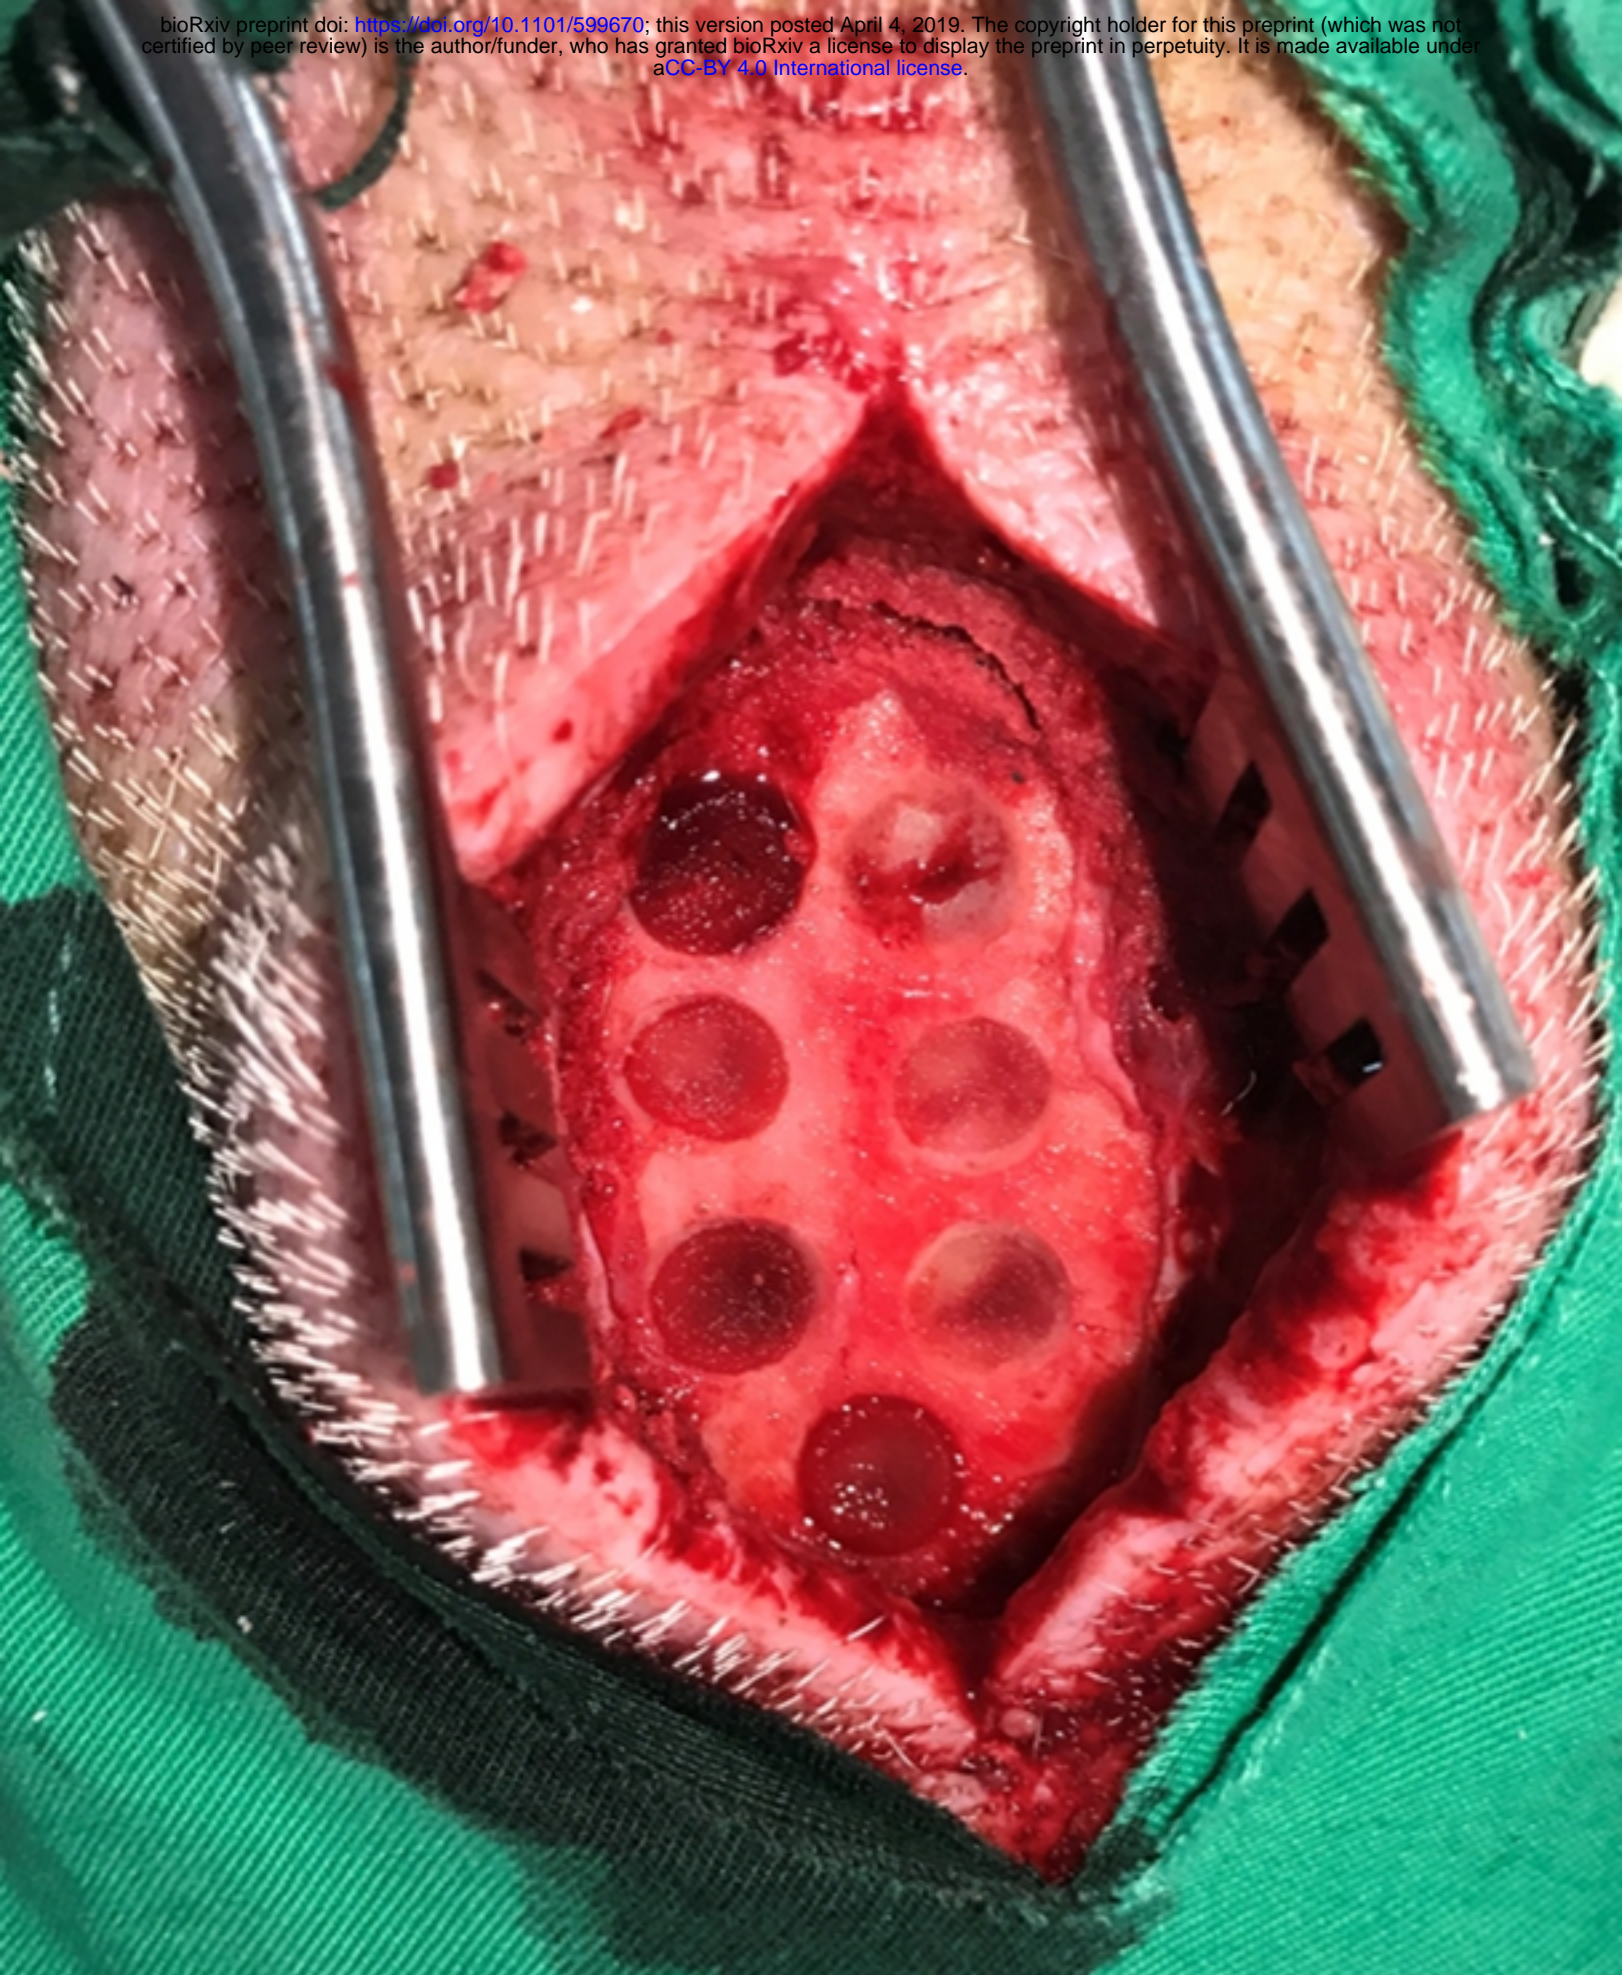

Figure 2



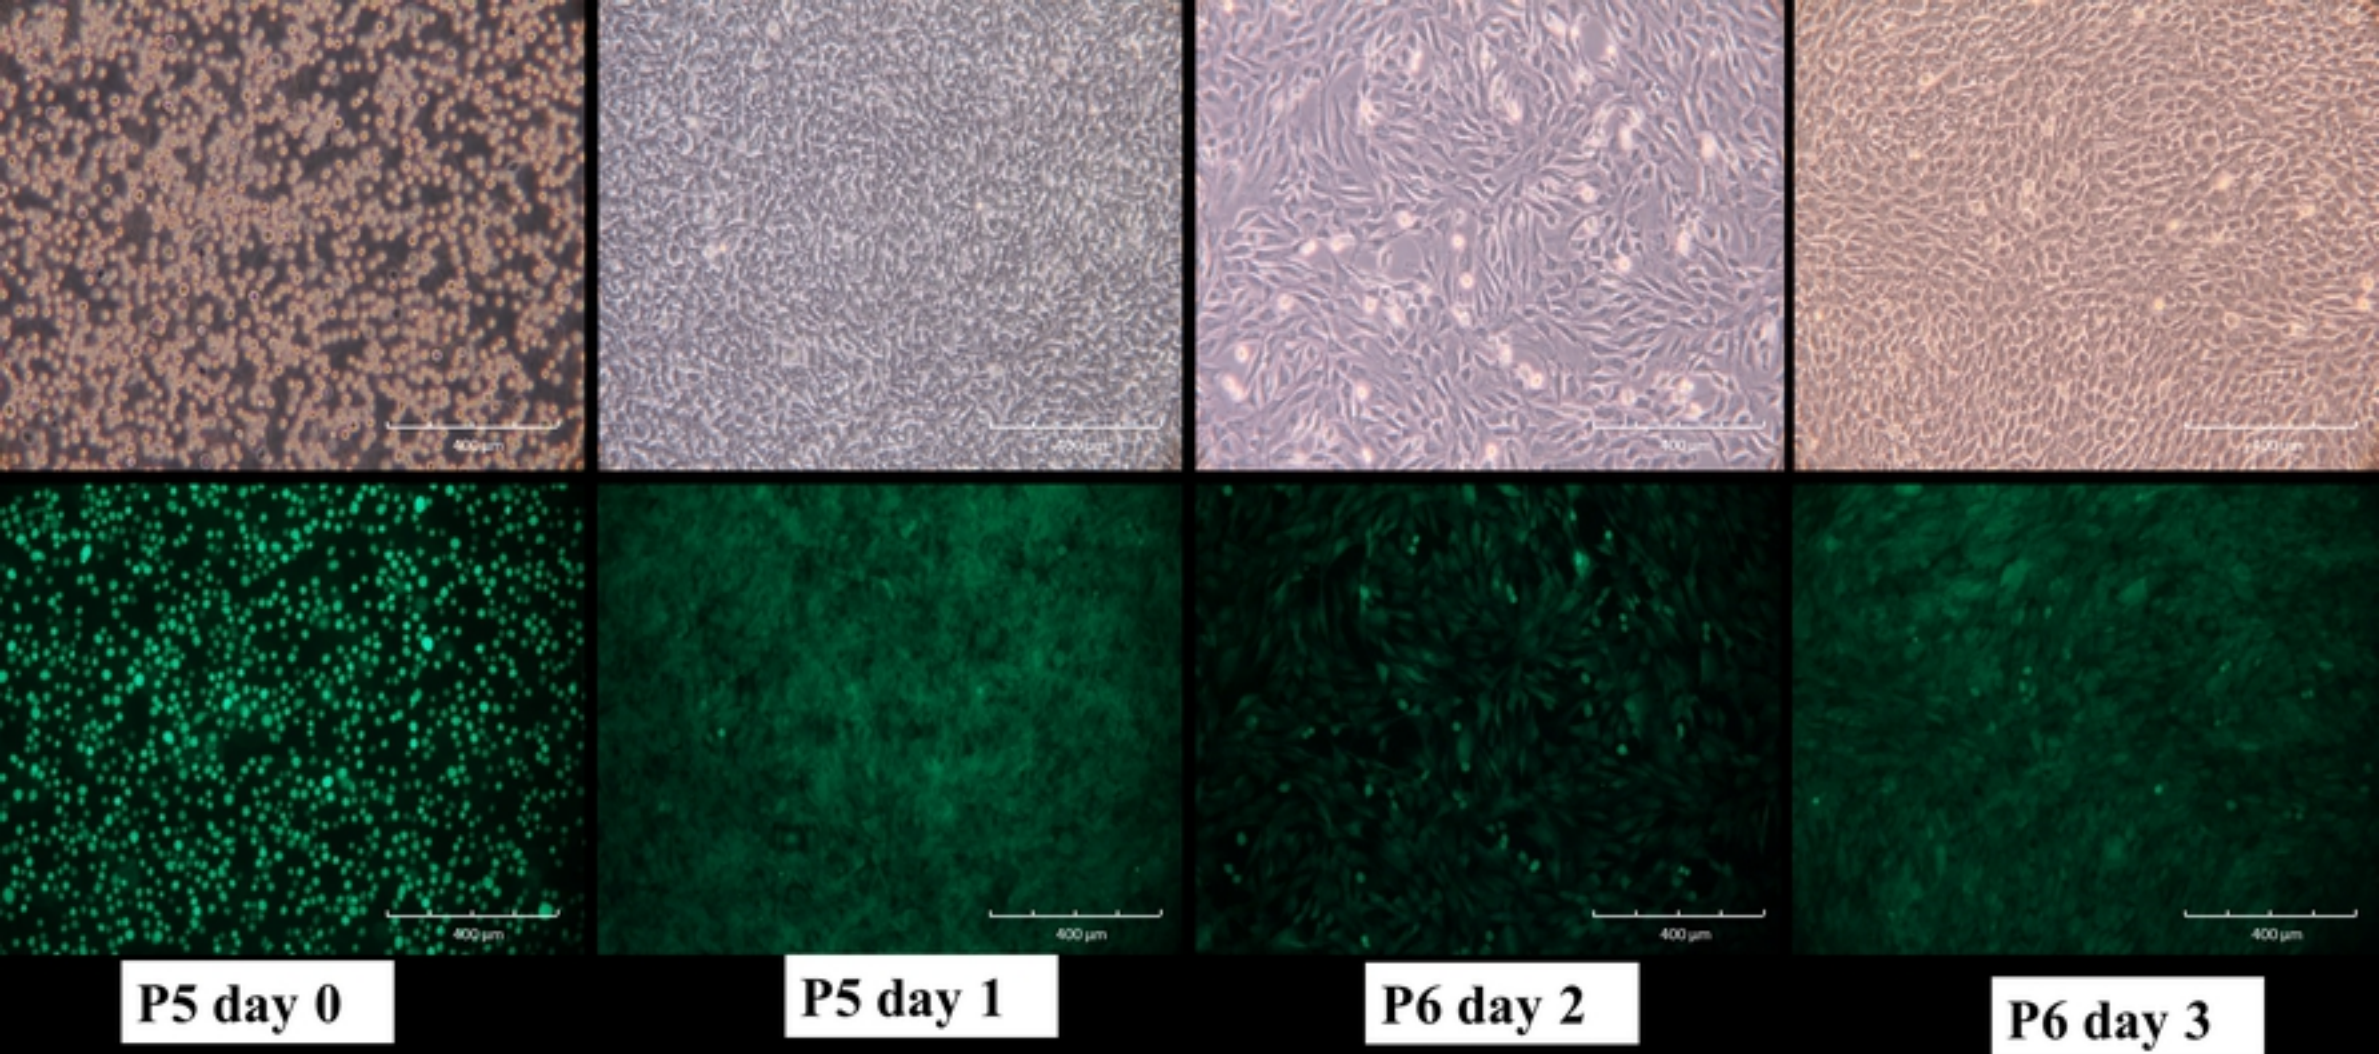

Figure3



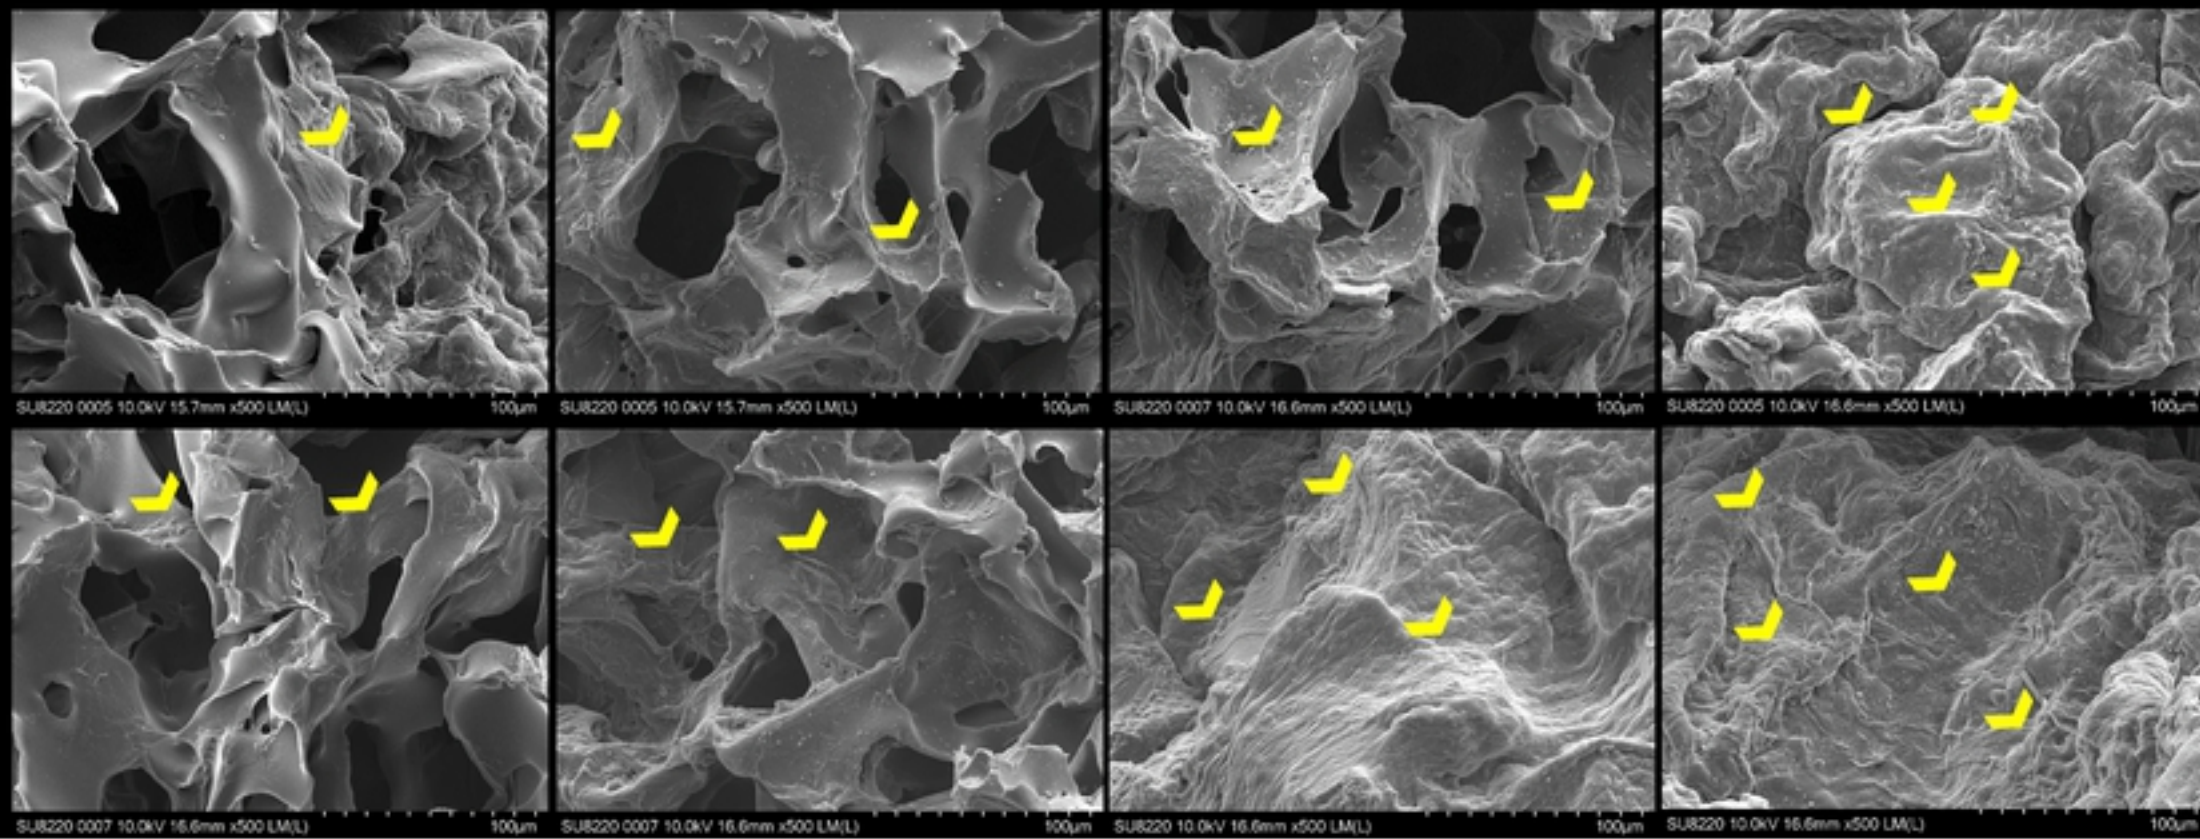

Figure5

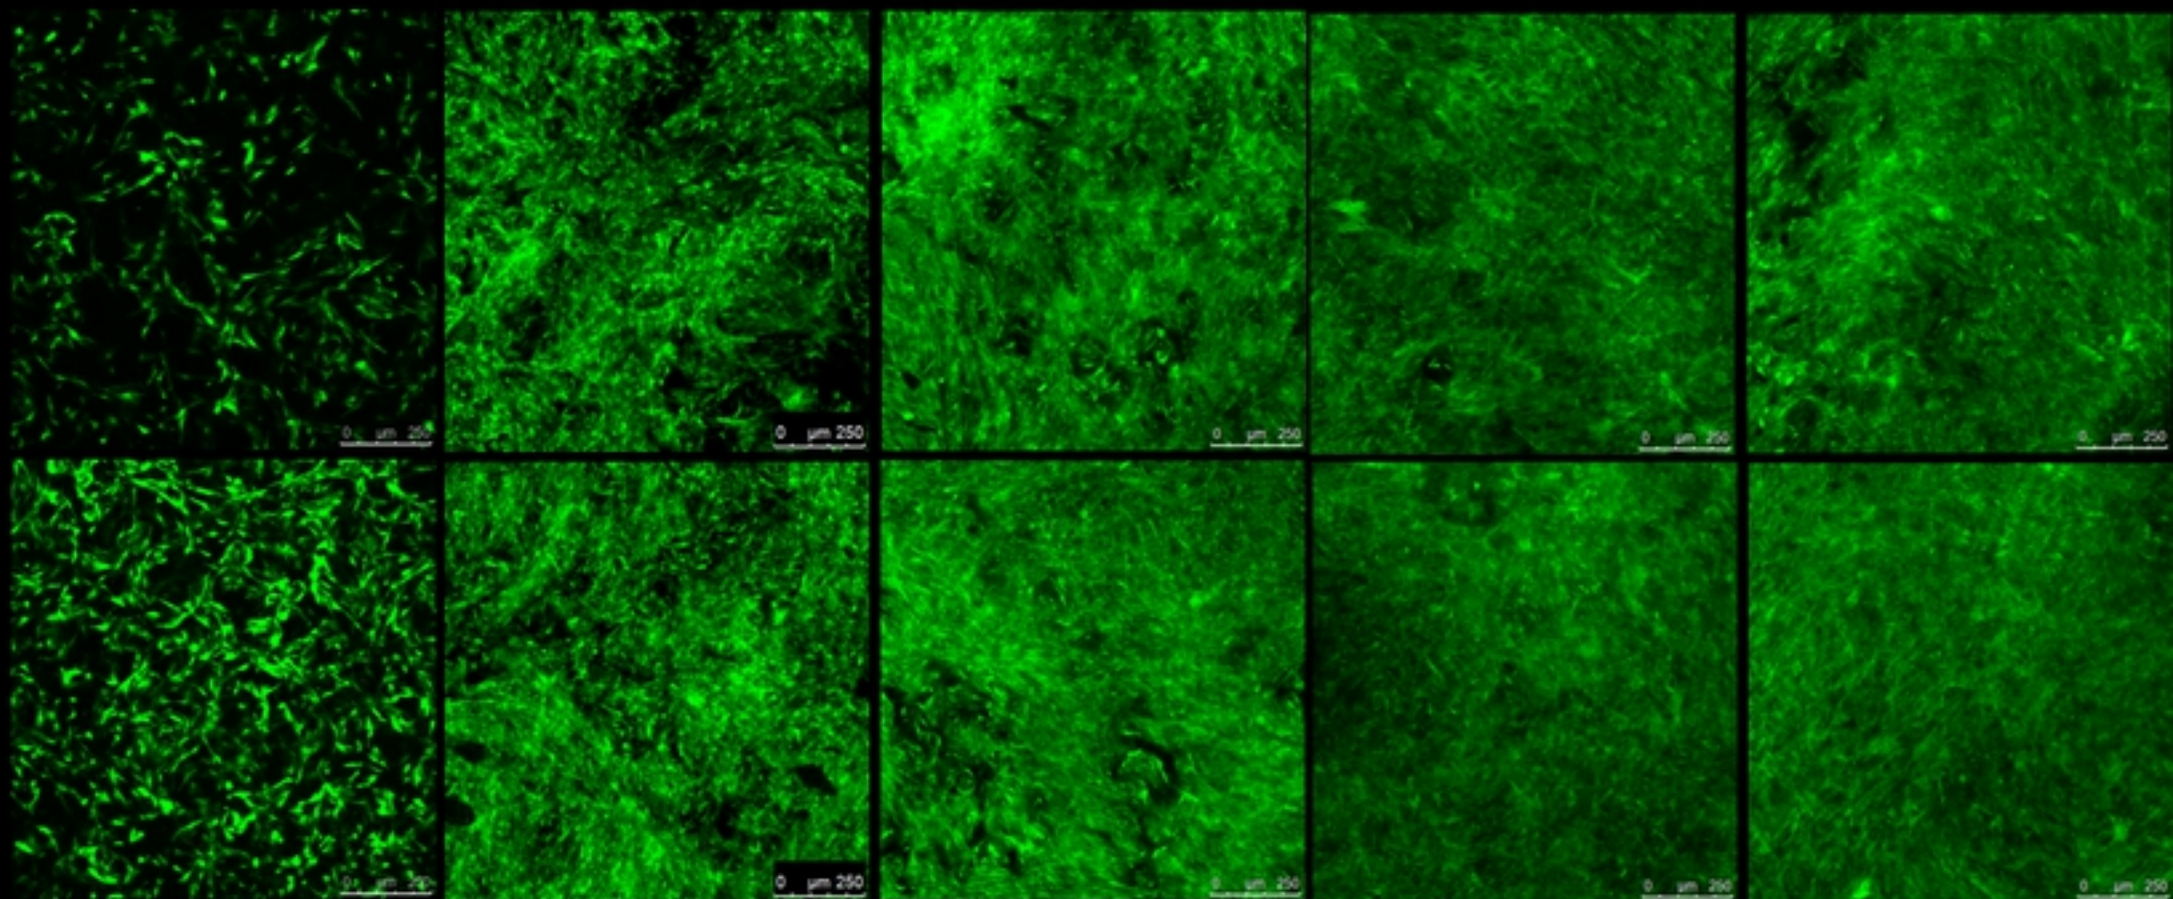

Figure6A



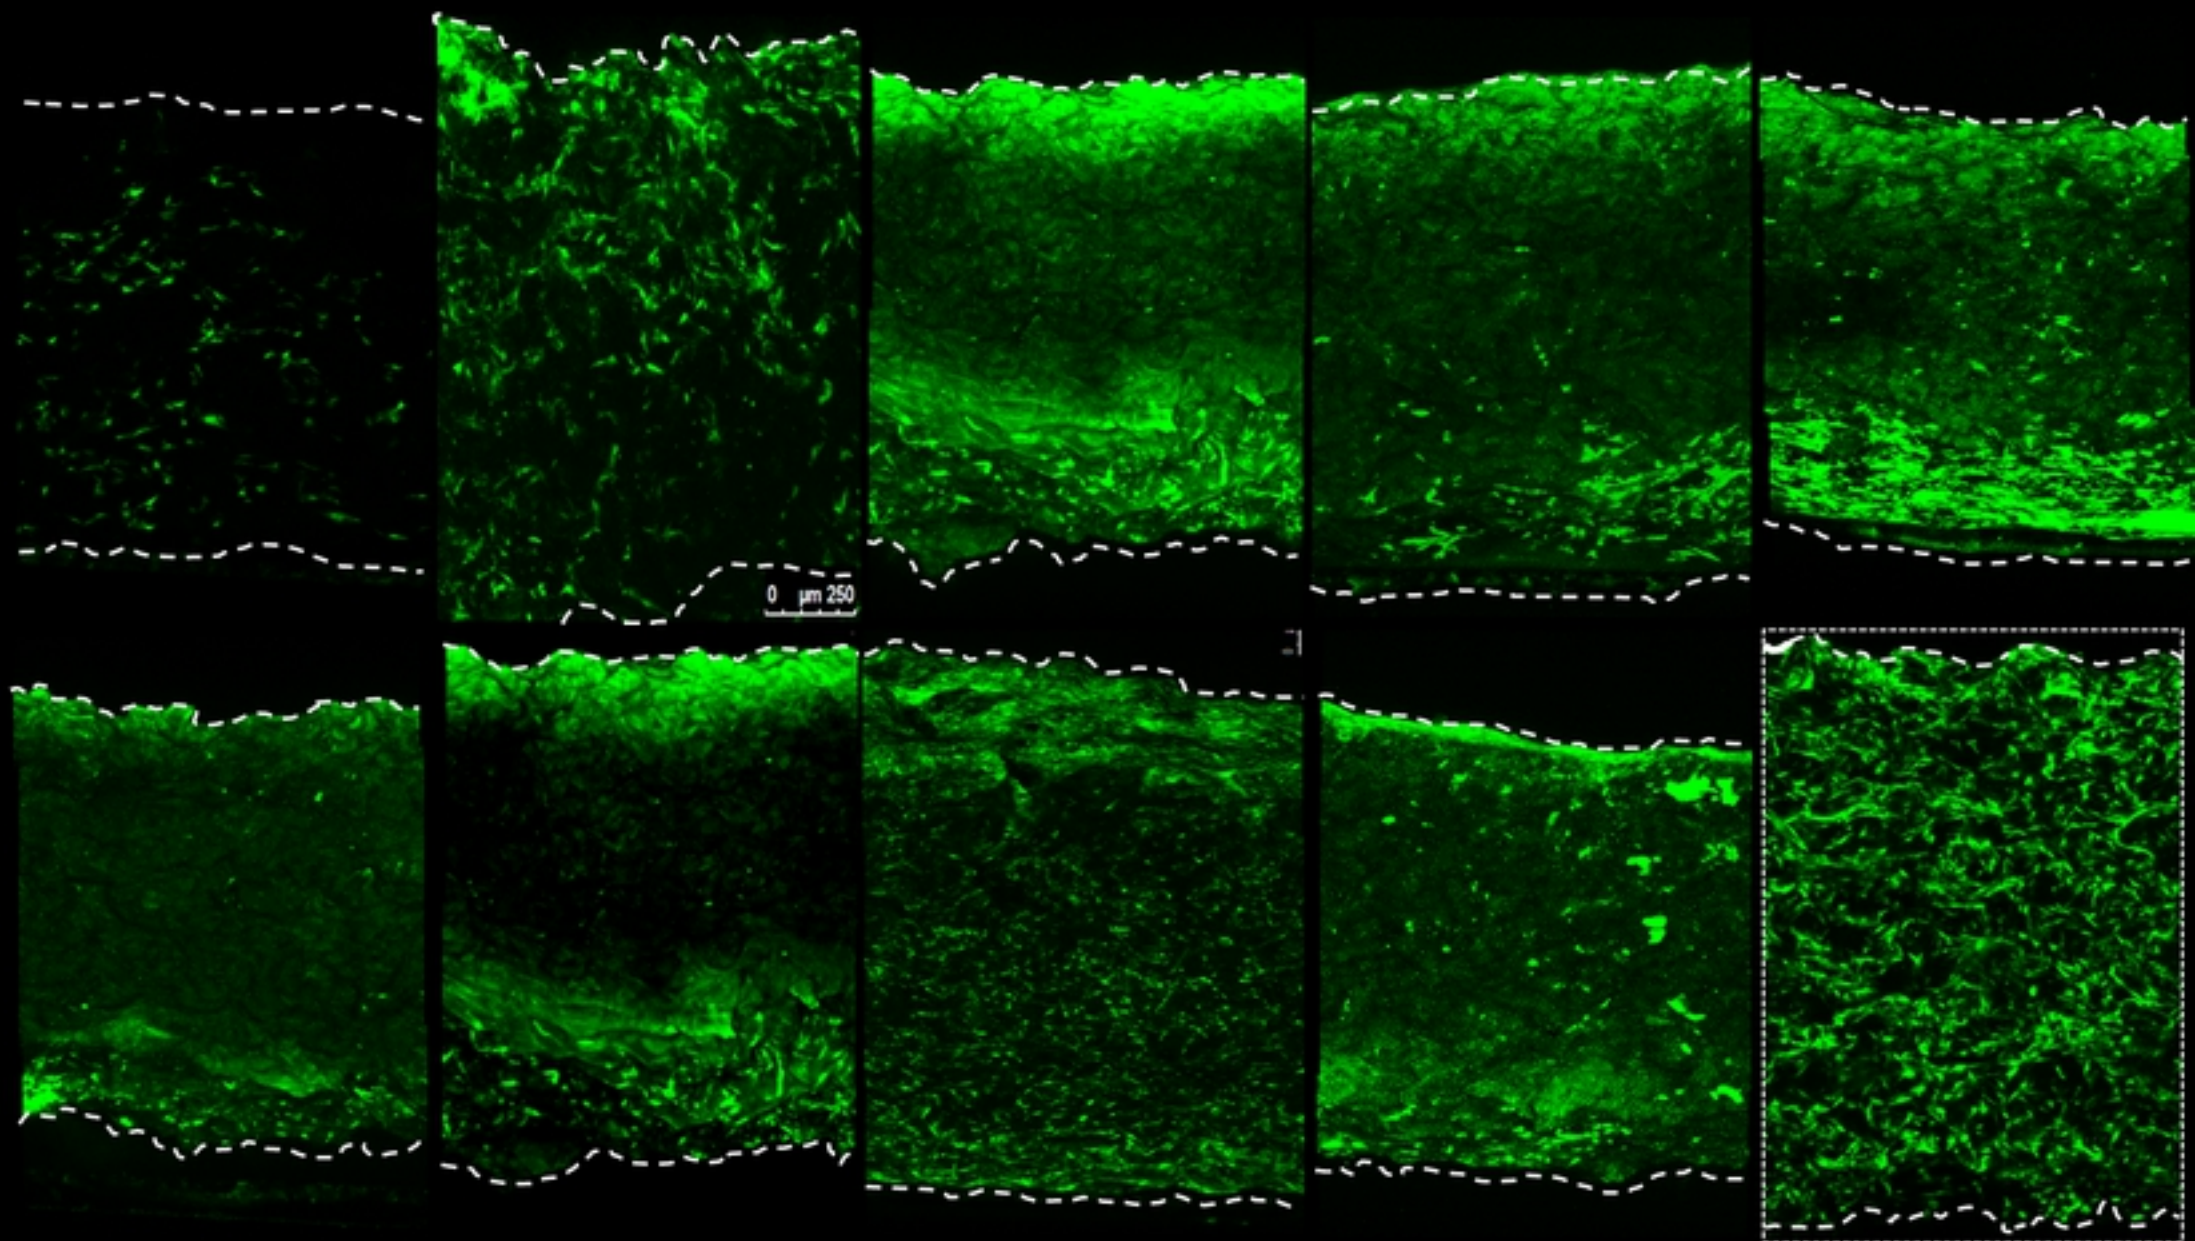

Figure6B

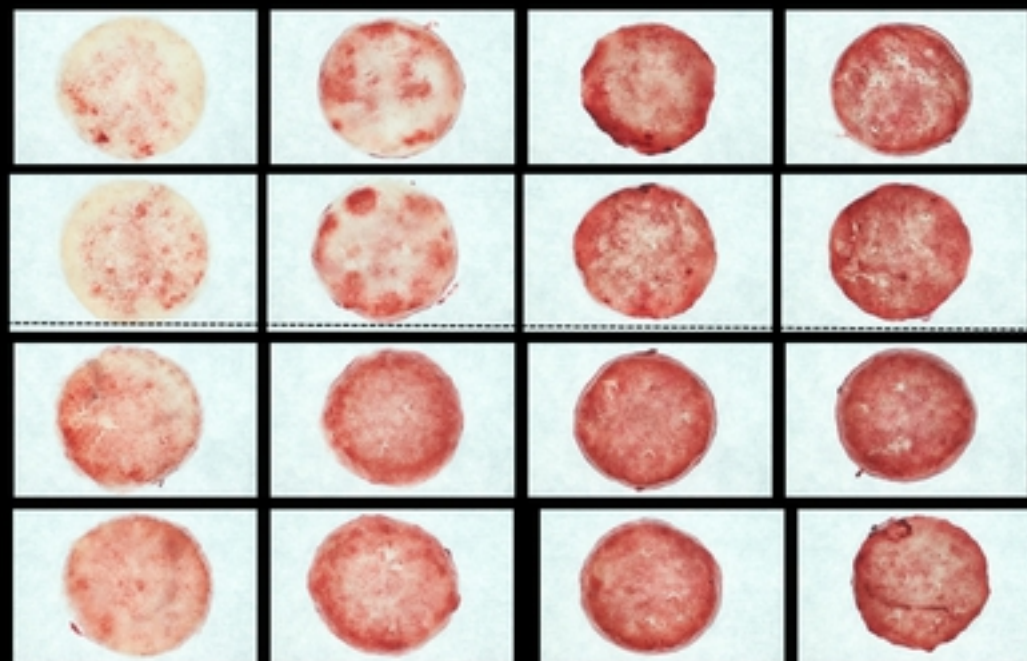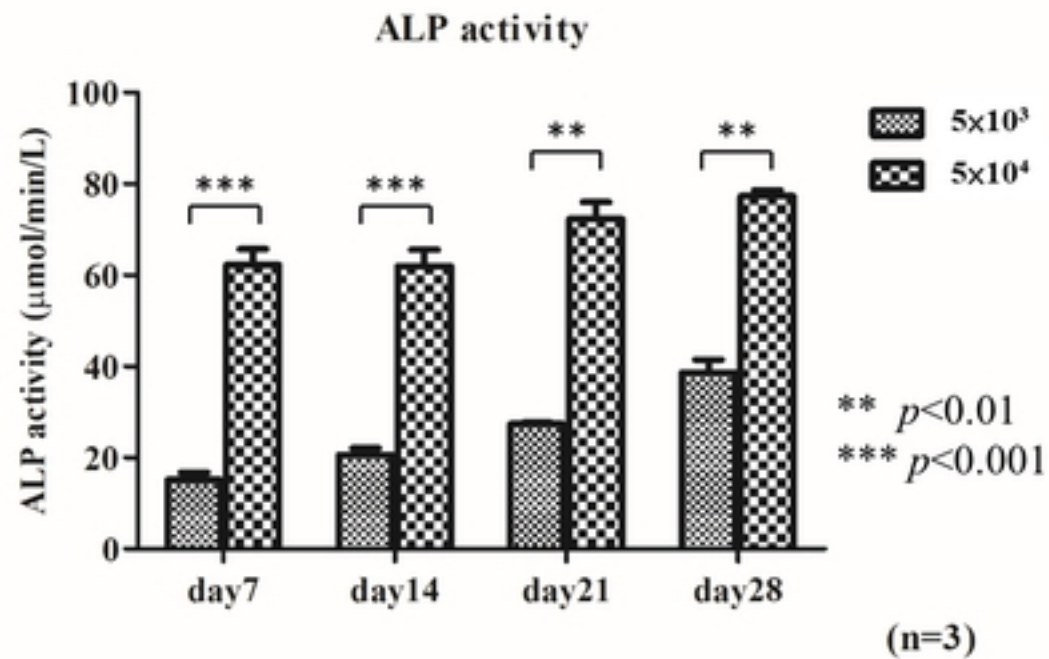

Figure 7



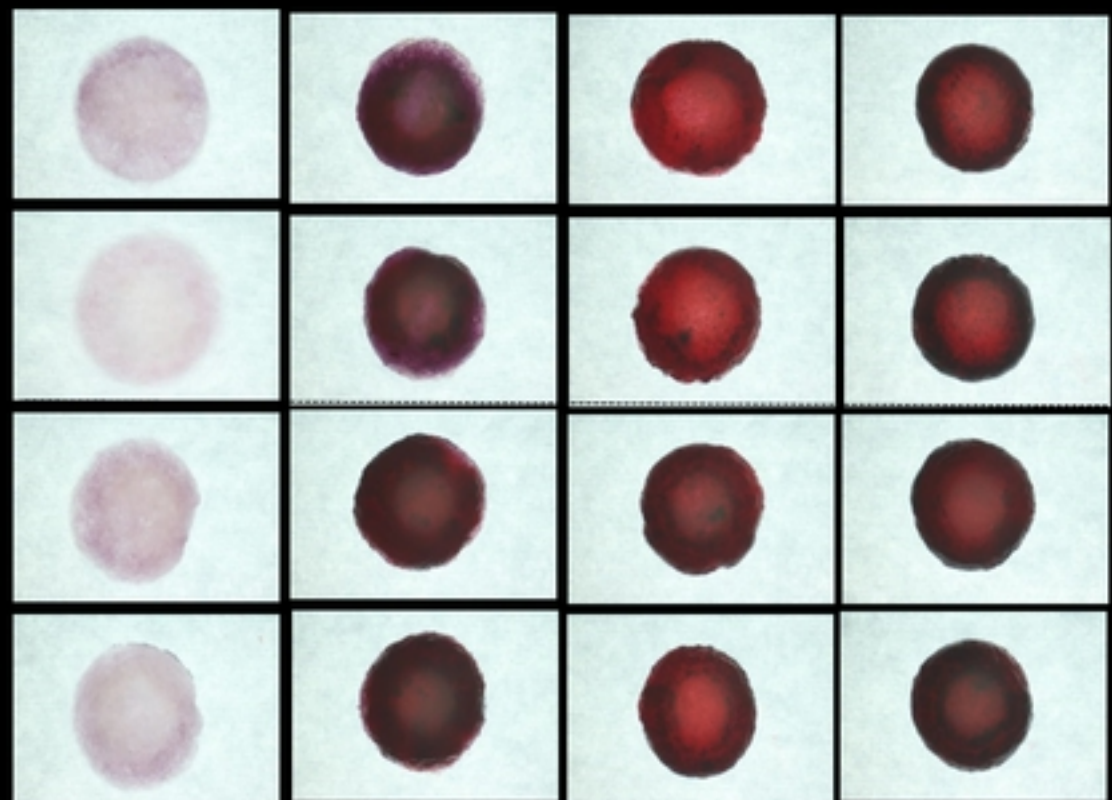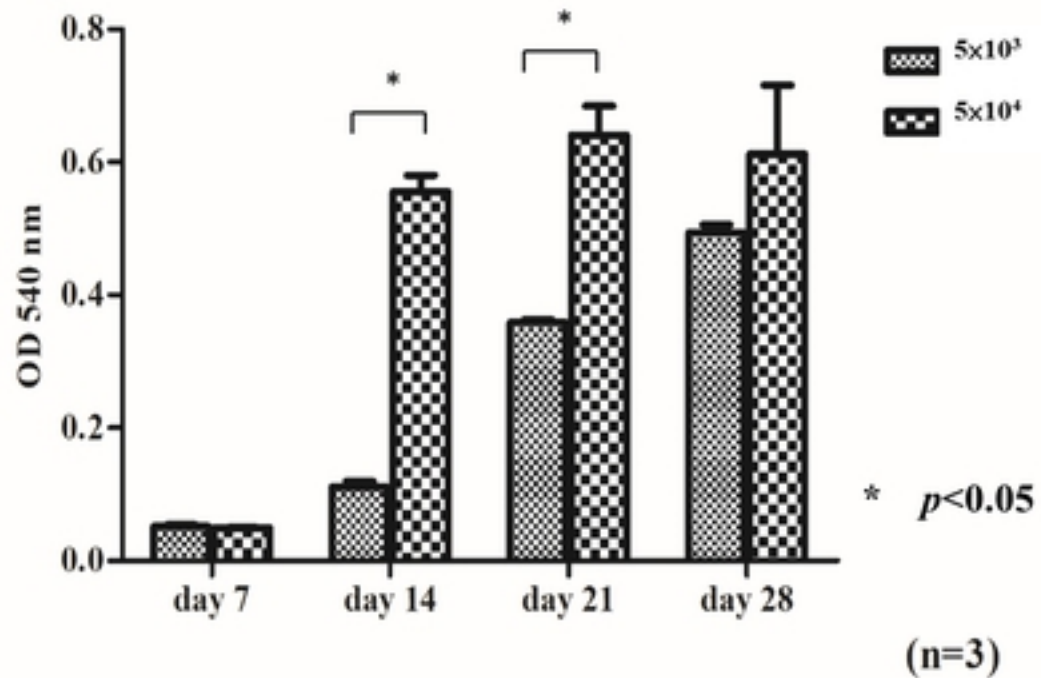

Figure8

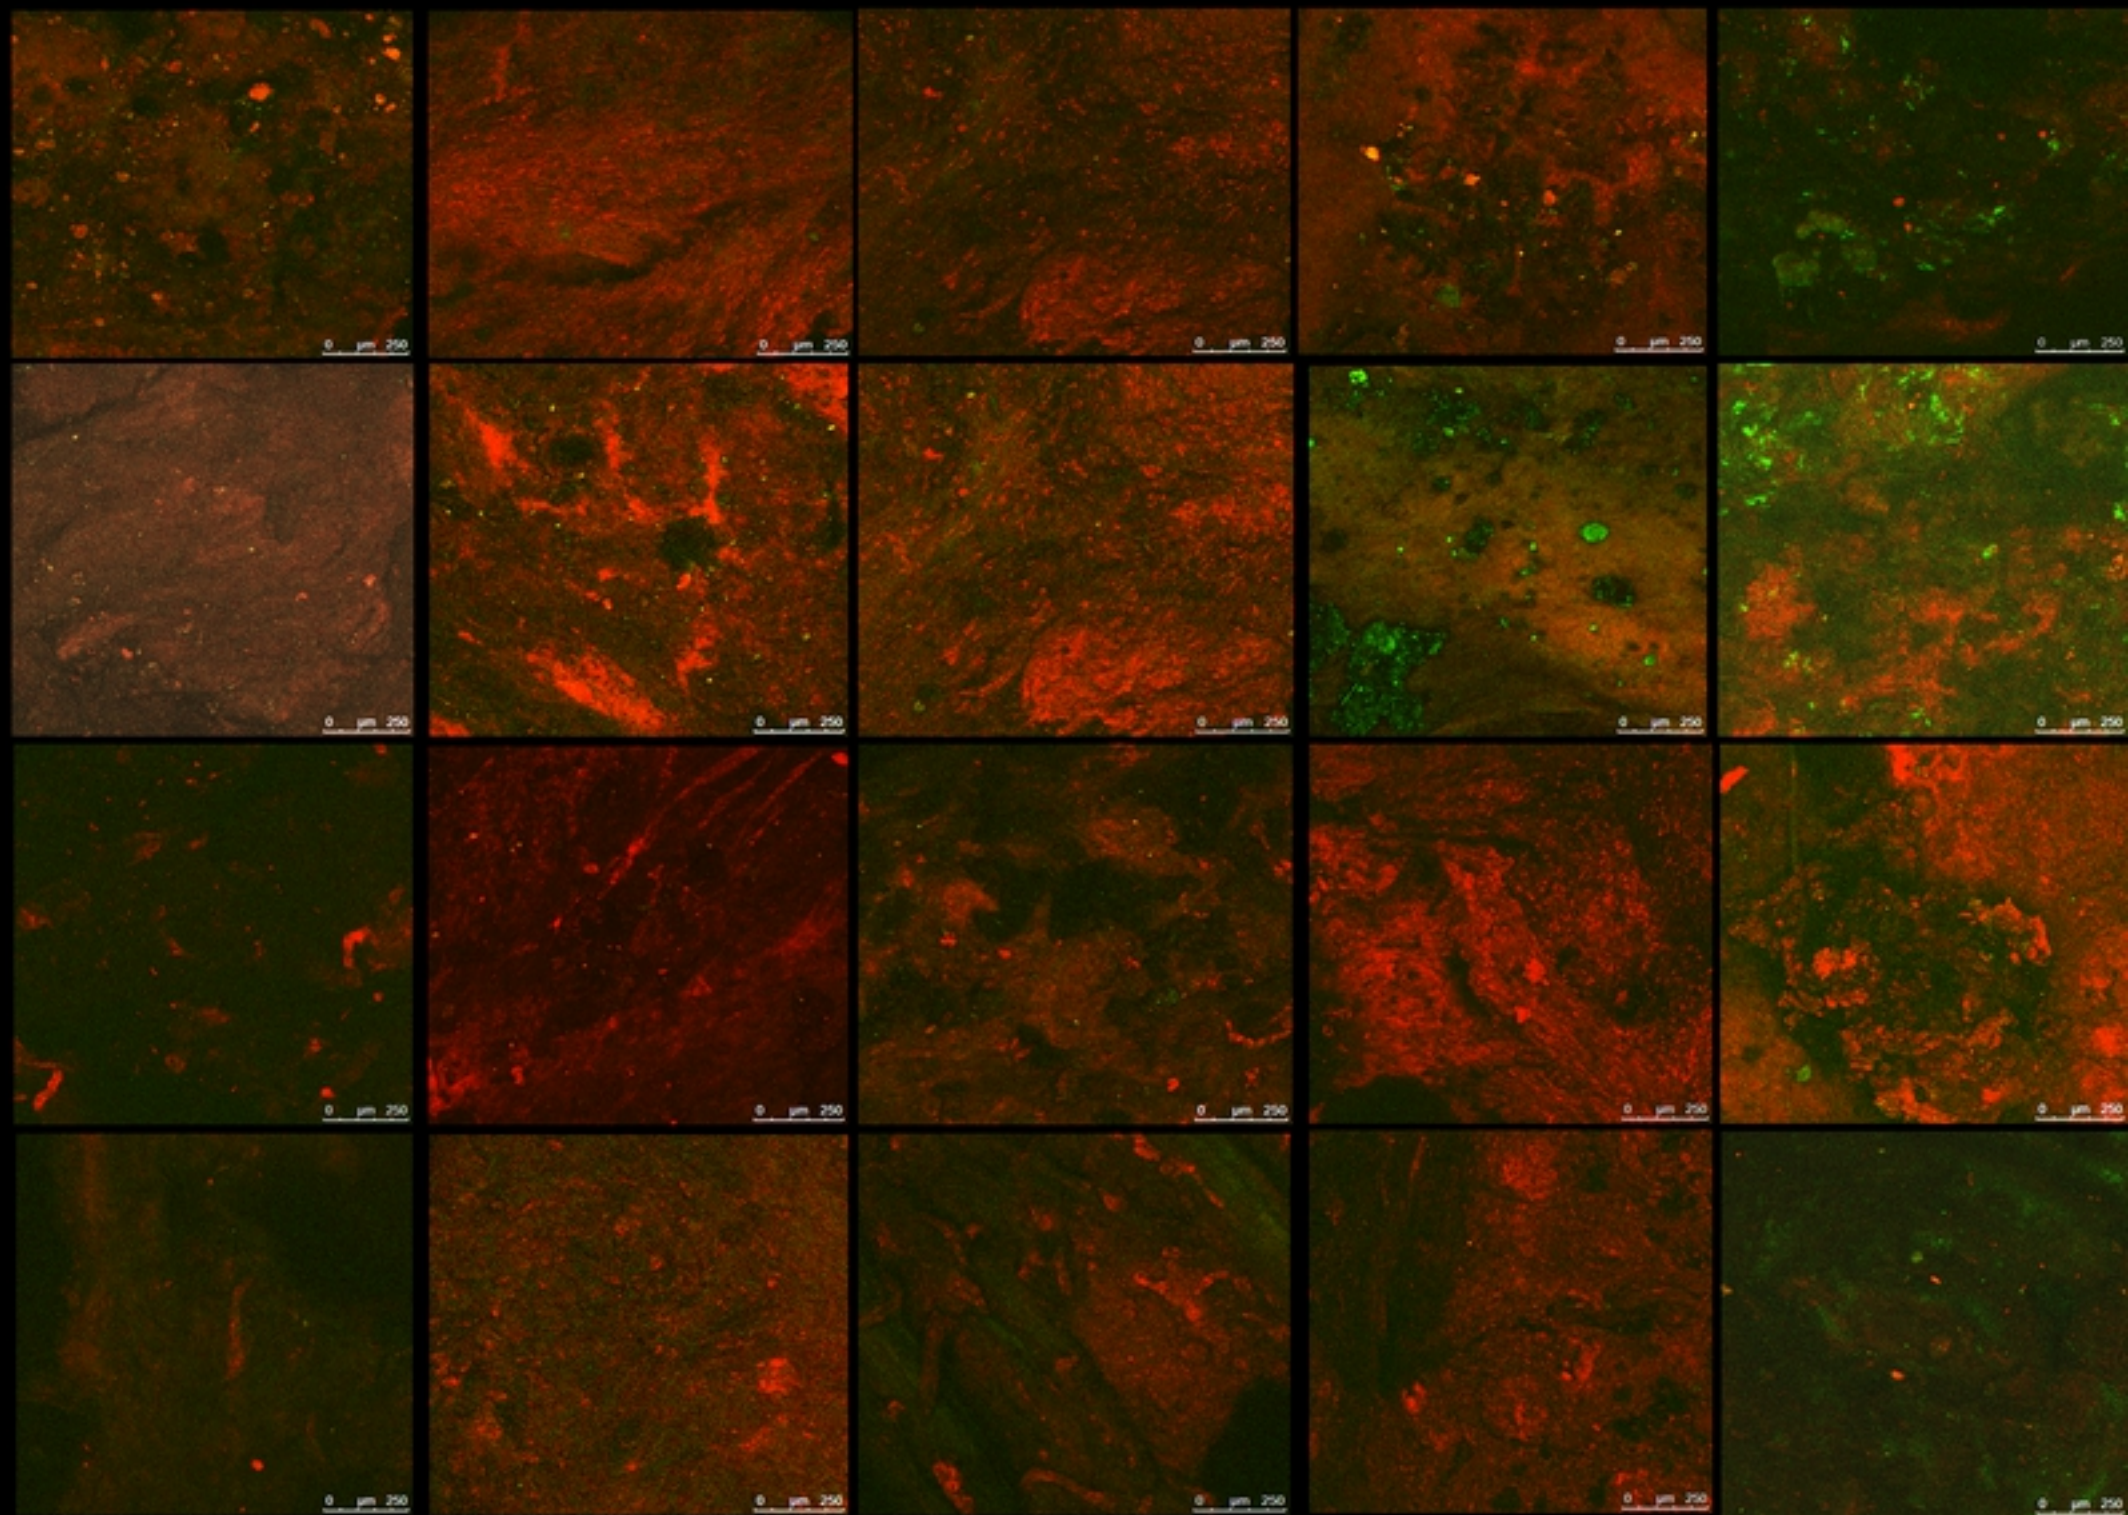

Figure9



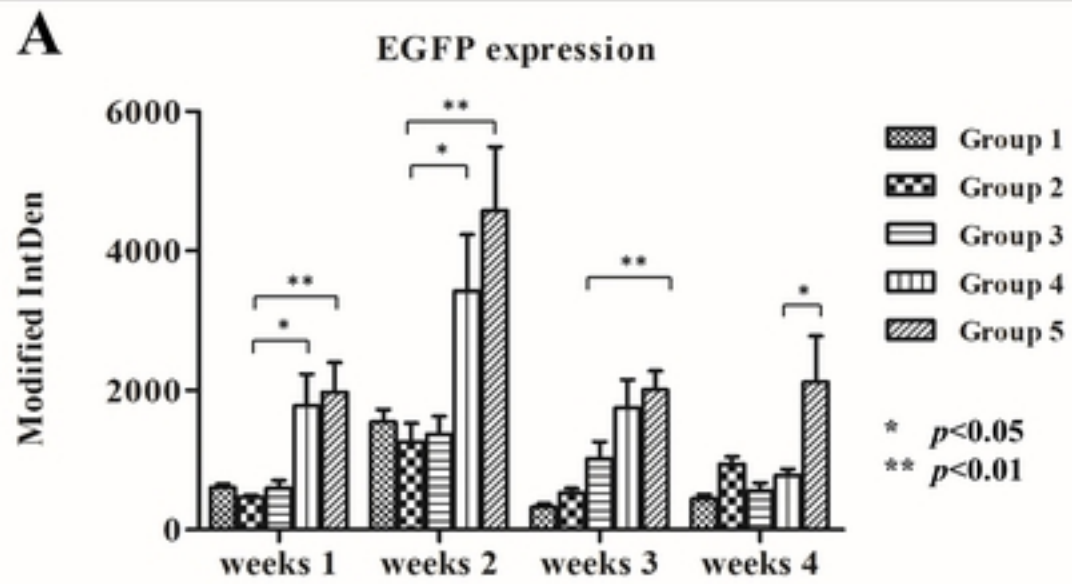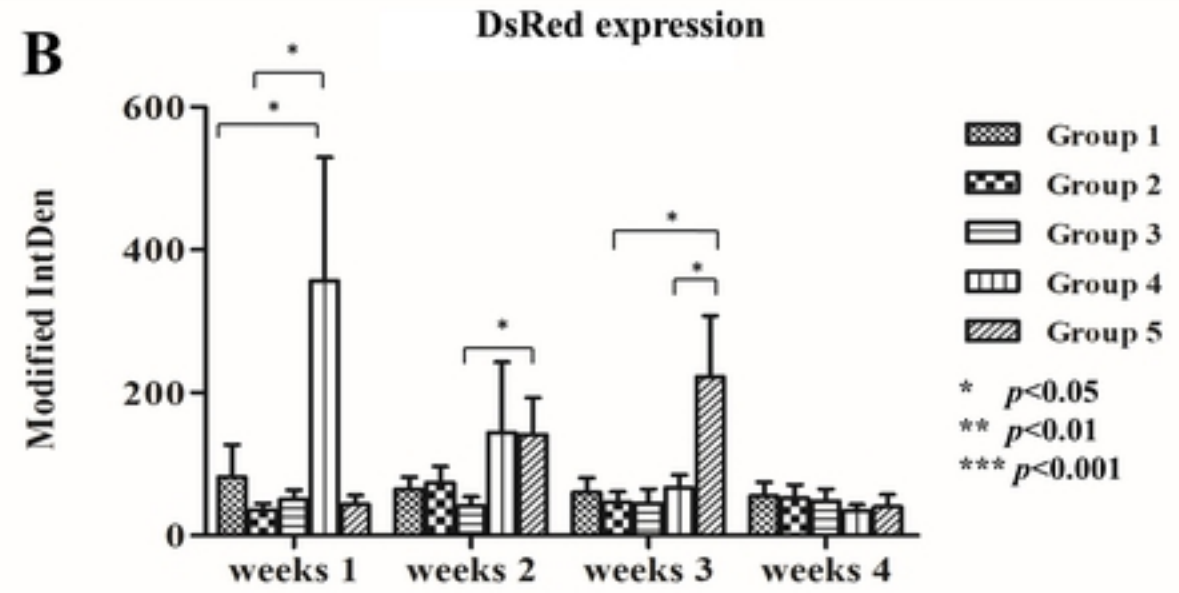

Figure 10



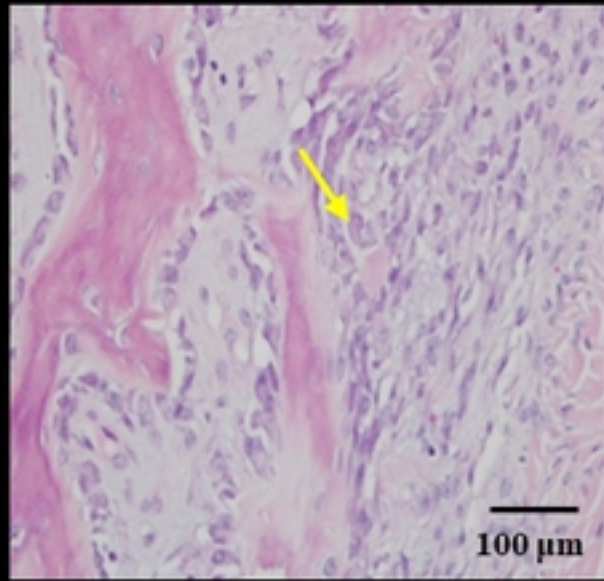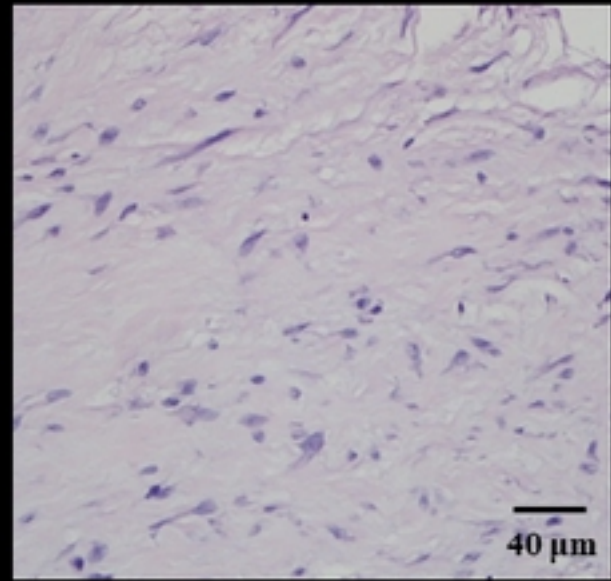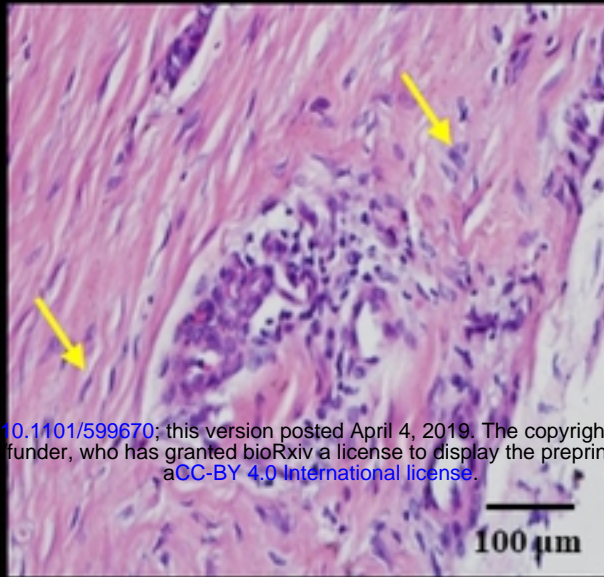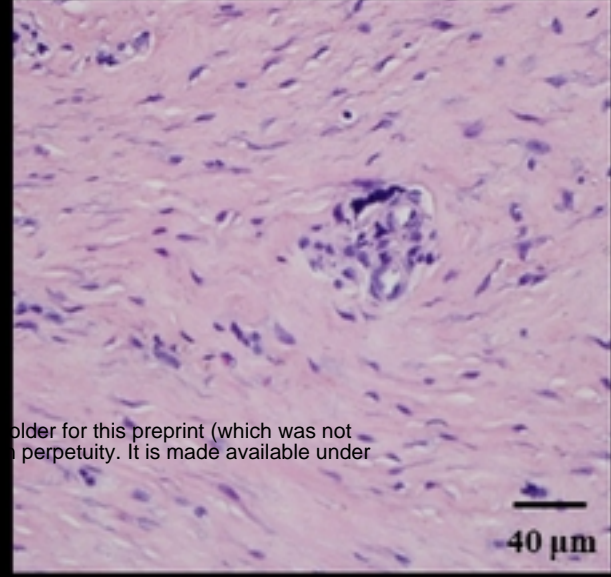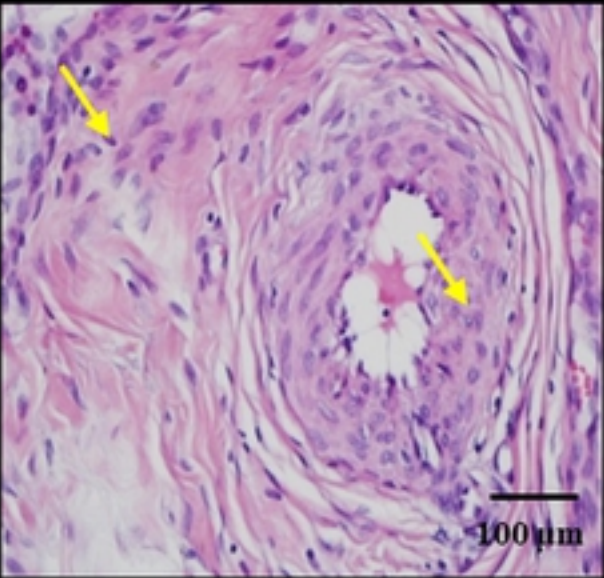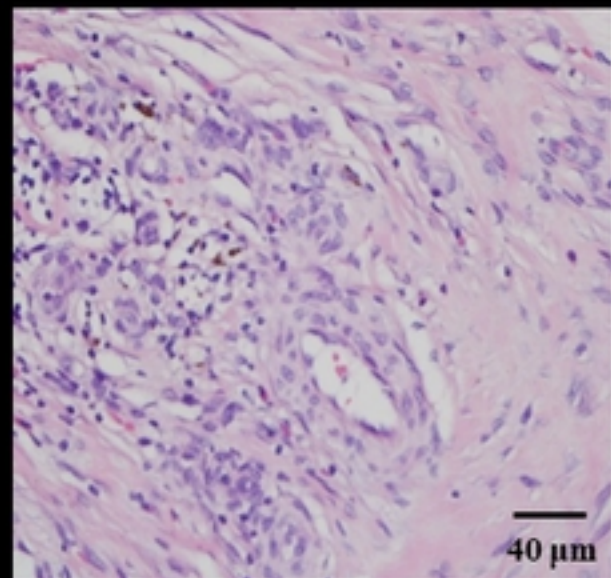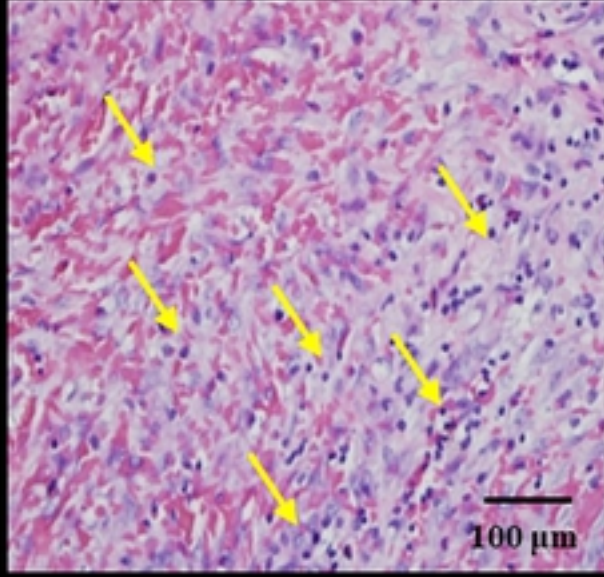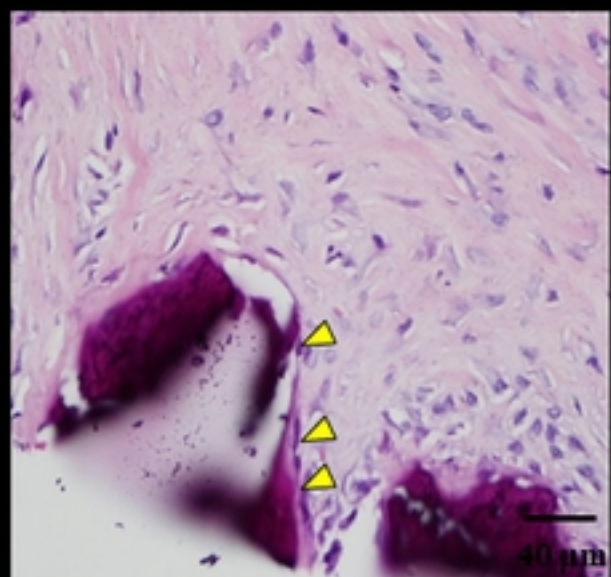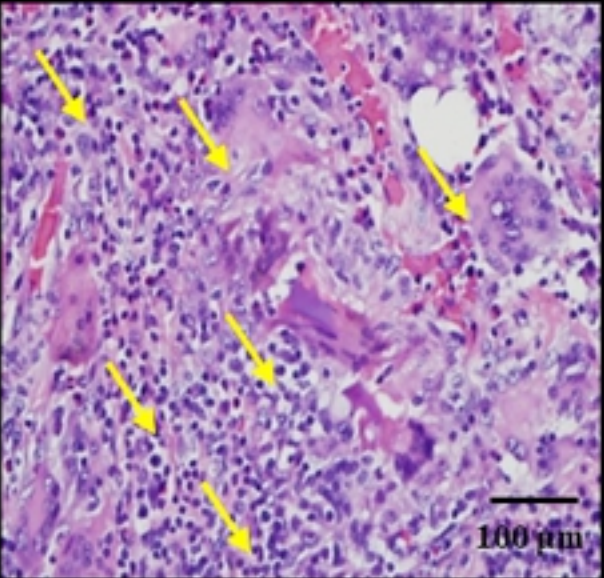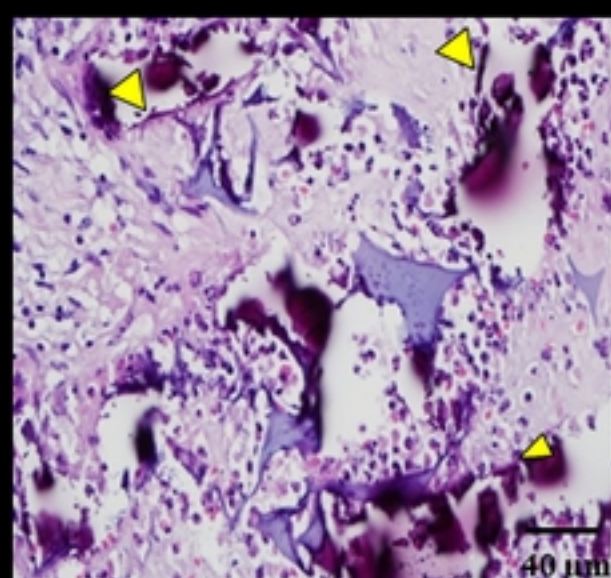

<https://doi.org/10.1101/599670>; this version posted April 4, 2019. The copyright holder for this preprint (which was not certified by peer review) is the author/funder, who has granted bioRxiv a license to display the preprint in perpetuity. It is made available under aCC-BY 4.0 International license.

Figure 11



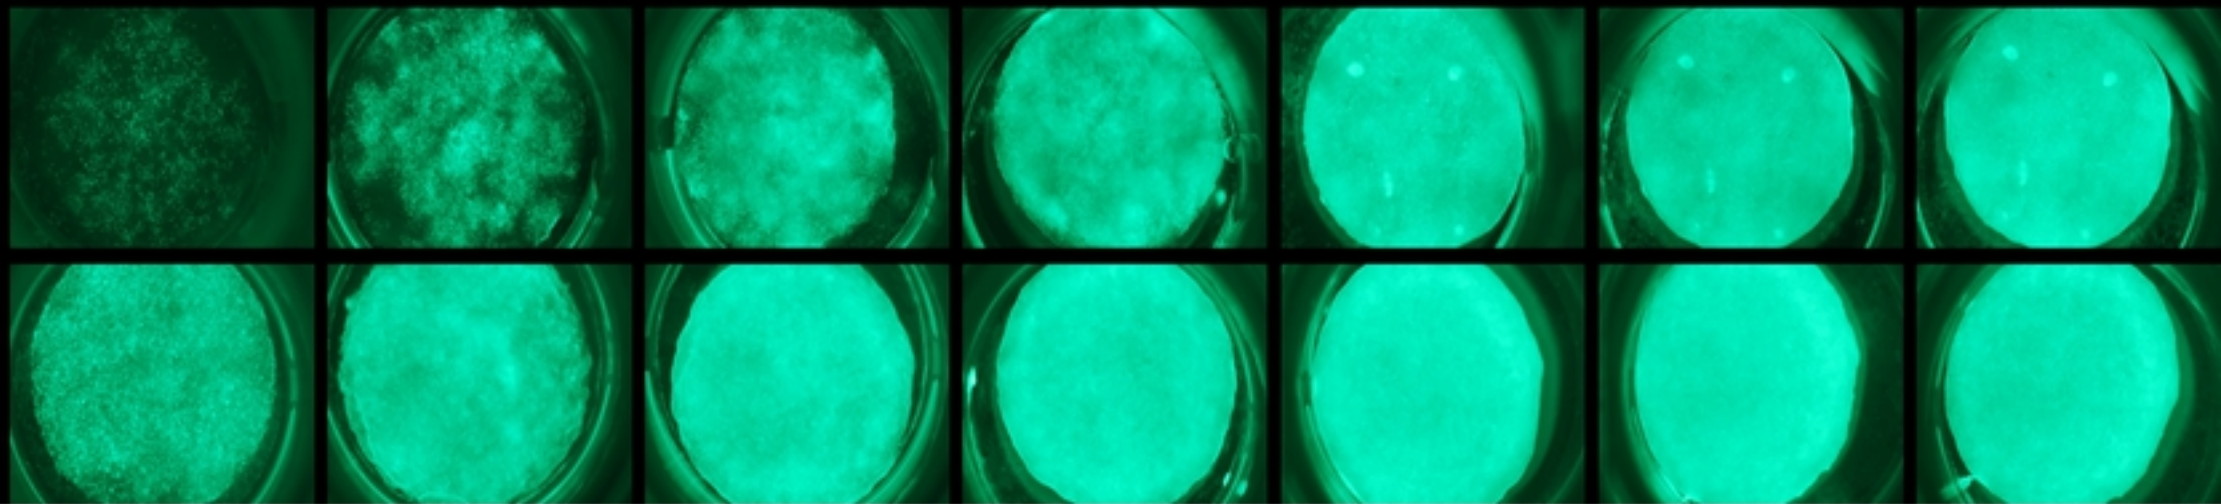

Figure4



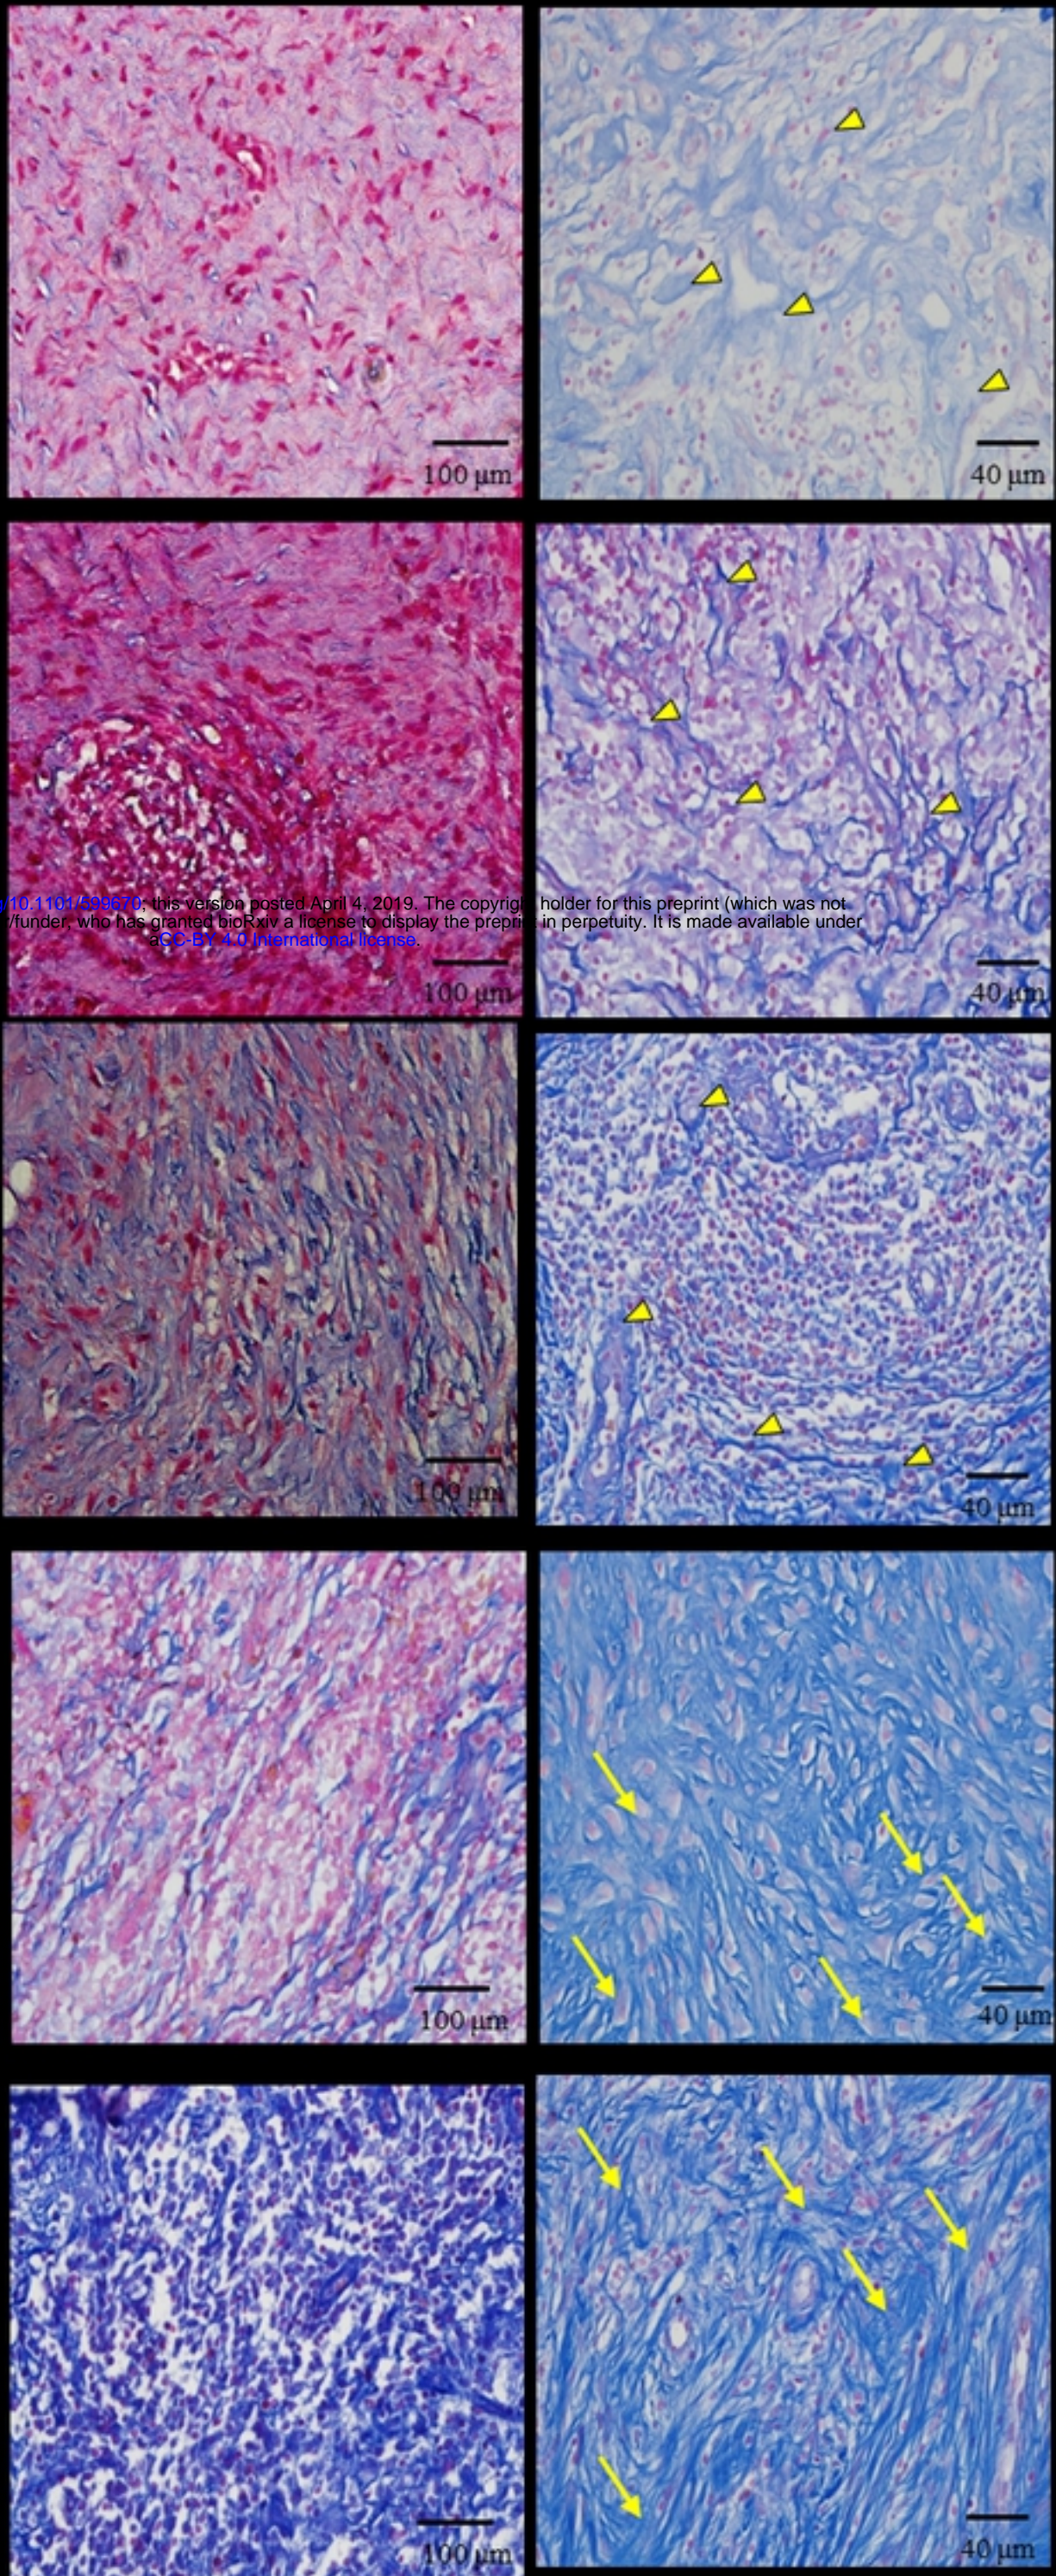

<https://doi.org/10.1101/399670>; this version posted April 4, 2019. The copyright holder for this preprint (which was not certified by peer review) is the author/funder, who has granted bioRxiv a license to display the preprint in perpetuity. It is made available under aCC-BY 4.0 International license.

Figure12



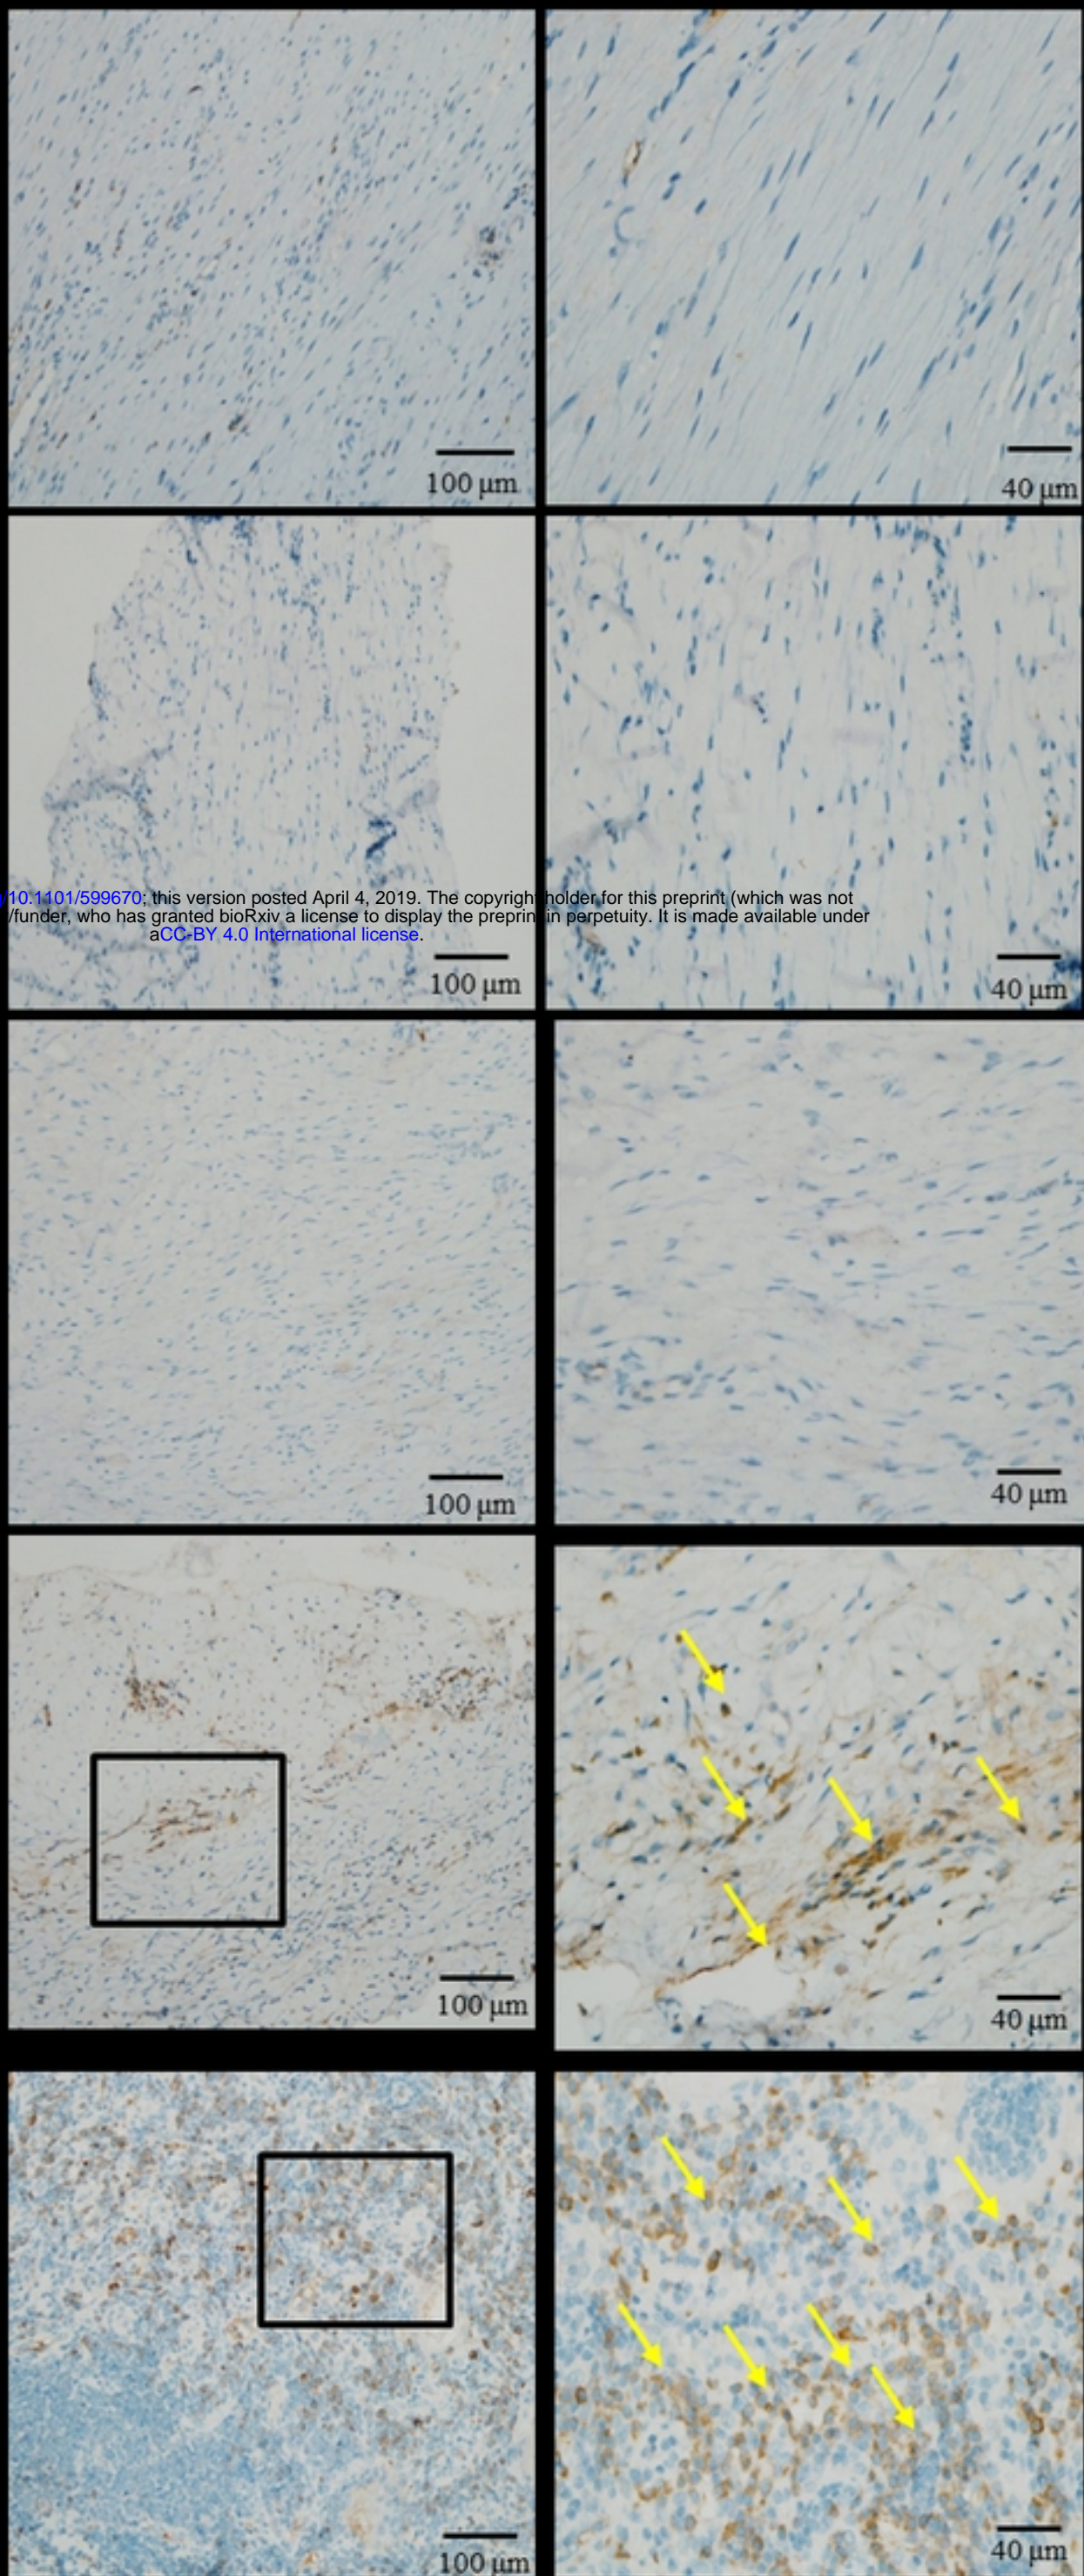

Figure13
